# Supplementary material for: New Triterpene Glycosides from the Far Eastern Starfish Solaster pacificus and Their Biological Activity
Source: PubMed Central journal article supplement (PMC8001898; doi:10.3390/biom11030427), 2021-03-14

# Supplementary Materials

## New Triterpene Glycosides from the Far Eastern Starfish *Solaster pacificus* and Their Biological Activity

Timofey V. Malyarenko<sup>1,2\*</sup>, Alla A. Kicha<sup>1</sup>, Anatoly I. Kalinovsky<sup>1</sup>, Pavel S. Dmitrenok<sup>1</sup>, Olesya S. Malyarenko<sup>1</sup>, Alexandra S. Kuzmich<sup>1</sup>, Valentin A. Stonik<sup>1,2</sup>, and Natalia V. Ivanchina<sup>1</sup>

<sup>1</sup> G.B. Elyakov Pacific Institute of Bioorganic Chemistry, Far Eastern Branch of the Russian Academy of Sciences, Pr. 100-let Vladivostoku 159, 690022 Vladivostok, Russia; kicha@piboc.dvo.ru (A.A.K.); kaaniw@piboc.dvo.ru (A.I.K.); paveldmt@piboc.dvo.ru (P.S.D.); malyarenko.os@gmail.com (O.S.M.); assavina@mail.ru (A.S.K.); stonik@piboc.dvo.ru (V.A.S.); ivanchina@piboc.dvo.ru (N.V.I.).

<sup>2</sup> Far Eastern Federal University, Sukhanova str. 8, 690000 Vladivostok, Russia

## List

- Figure S1.** (–)HRESIMS spectrum of pacificusoside A (**1**).
- Figure S2.** IR spectrum of pacificusoside A (**1**) in KBr.
- Figure S3.** UV spectrum of pacificusoside A (**1**) in MeOH.
- Figure S4.**  $^1\text{H}$  NMR spectrum of pacificusoside A (**1**) in  $\text{C}_5\text{D}_5\text{N}$ .
- Figure S5.**  $^{13}\text{C}$  NMR spectrum of pacificusoside A (**1**) in  $\text{C}_5\text{D}_5\text{N}$ .
- Figure S6.**  $^1\text{H}$ - $^1\text{H}$  COSY spectrum of pacificusoside A (**1**) in  $\text{C}_5\text{D}_5\text{N}$ .
- Figure S7.** HSQC spectrum of pacificusoside A (**1**) in  $\text{C}_5\text{D}_5\text{N}$ .
- Figure S8.** HMBC spectrum of pacificusoside A (**1**) in  $\text{C}_5\text{D}_5\text{N}$ .
- Figure S9.** ROESY spectrum of pacificusoside A (**1**) in  $\text{C}_5\text{D}_5\text{N}$ .
- Figure S10.** (–)HRESIMS spectrum of pacificusoside B (**2**).
- Figure S11.** IR spectrum of pacificusoside B (**2**) in KBr.
- Figure S12.**  $^1\text{H}$ -NMR spectrum of pacificusoside B (**2**) in  $\text{C}_5\text{D}_5\text{N}$ .
- Figure S13.**  $^{13}\text{C}$ -NMR spectrum of pacificusoside B (**2**) in  $\text{C}_5\text{D}_5\text{N}$ .
- Figure S14.**  $^1\text{H}$ - $^1\text{H}$ -COSY spectrum of pacificusoside B (**2**) in  $\text{C}_5\text{D}_5\text{N}$ .
- Figure S15.** HSQC spectrum of pacificusoside B (**2**) in  $\text{C}_5\text{D}_5\text{N}$ .
- Figure S16.** HMBC spectrum of pacificusoside B (**2**) in  $\text{C}_5\text{D}_5\text{N}$ .
- Figure S17.** ROESY spectrum of pacificusoside B (**2**) in  $\text{C}_5\text{D}_5\text{N}$ .
- Figure S18.** (–)HRESIMS spectrum of pacificusoside C (**3**).
- Figure S19.** IR spectrum of pacificusoside C (**3**) in KBr.
- Figure S20.**  $^1\text{H}$ -NMR spectrum of pacificusoside C (**3**) in  $\text{C}_5\text{D}_5\text{N}$ .
- Figure S21.**  $^{13}\text{C}$ -NMR spectrum of pacificusoside C (**3**) in  $\text{C}_5\text{D}_5\text{N}$ .
- Figure S22.**  $^1\text{H}$ - $^1\text{H}$ -COSY spectrum of pacificusoside C (**3**) in  $\text{C}_5\text{D}_5\text{N}$ .
- Figure S23.** HSQC spectrum of pacificusoside C (**3**) in  $\text{C}_5\text{D}_5\text{N}$ .
- Figure S24.** HMBC spectrum of pacificusoside C (**3**) in  $\text{C}_5\text{D}_5\text{N}$ .
- Figure S25.** ROESY spectrum of pacificusoside C (**3**) in  $\text{C}_5\text{D}_5\text{N}$ .

Figure S1. (-)HRESIMS spectrum of pacificusoside A (1).

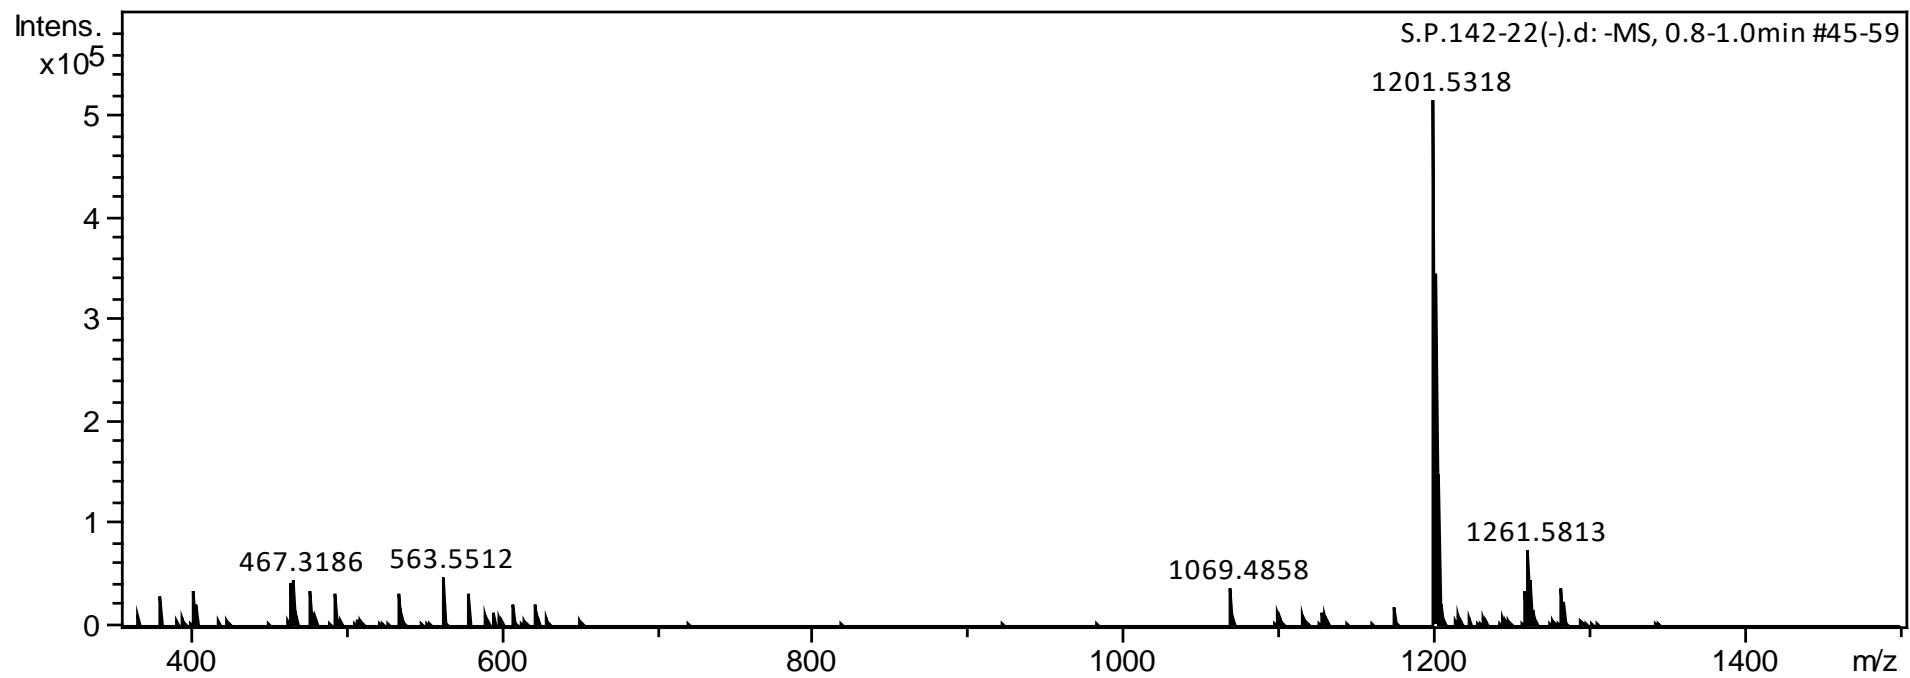

Figure S2. IR spectrum of pacificusoside A (1) in KBr.

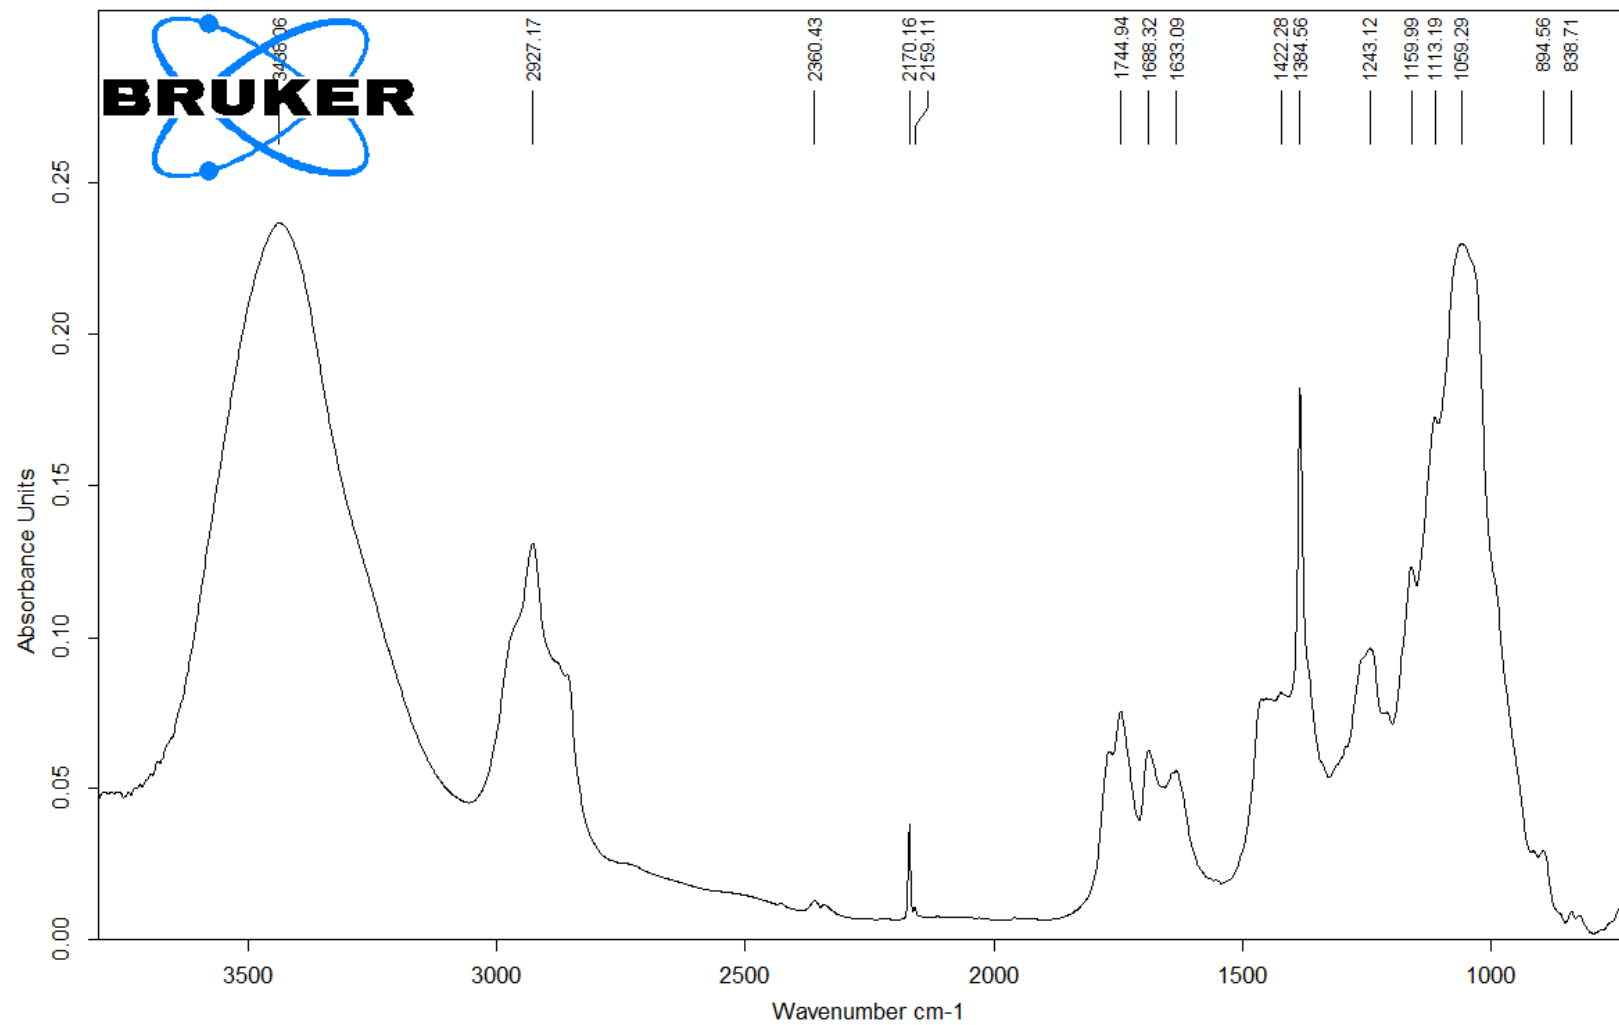

**Figure S3.** UV spectrum of pacificusoside A (**1**) in MeOH.

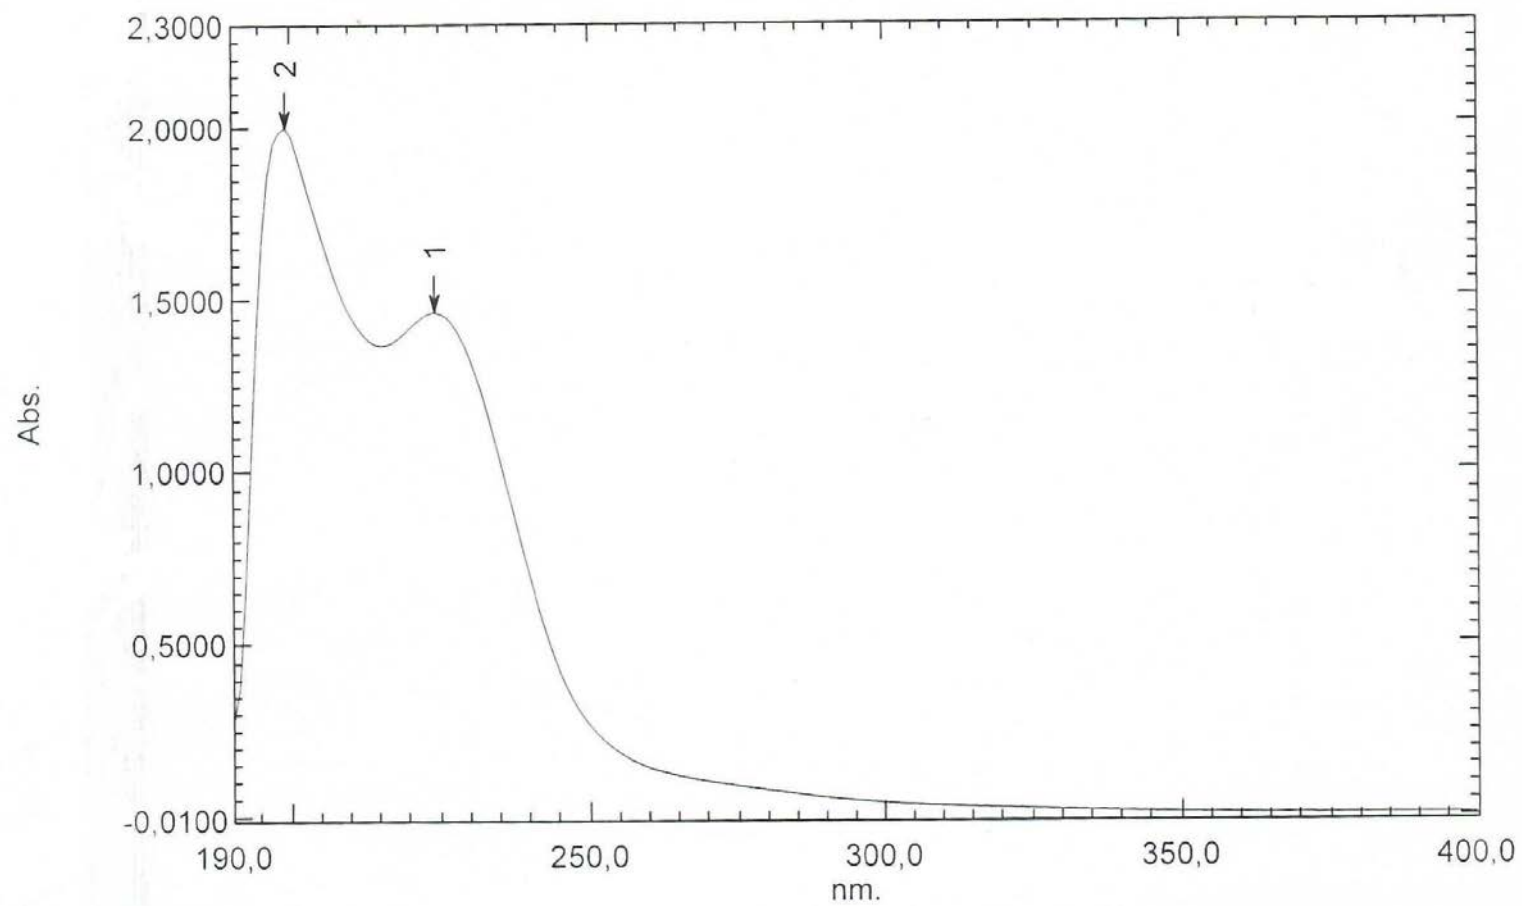

Figure S4. <sup>1</sup>H NMR spectrum of pacificusoside A (1) in C<sub>5</sub>D<sub>5</sub>N.

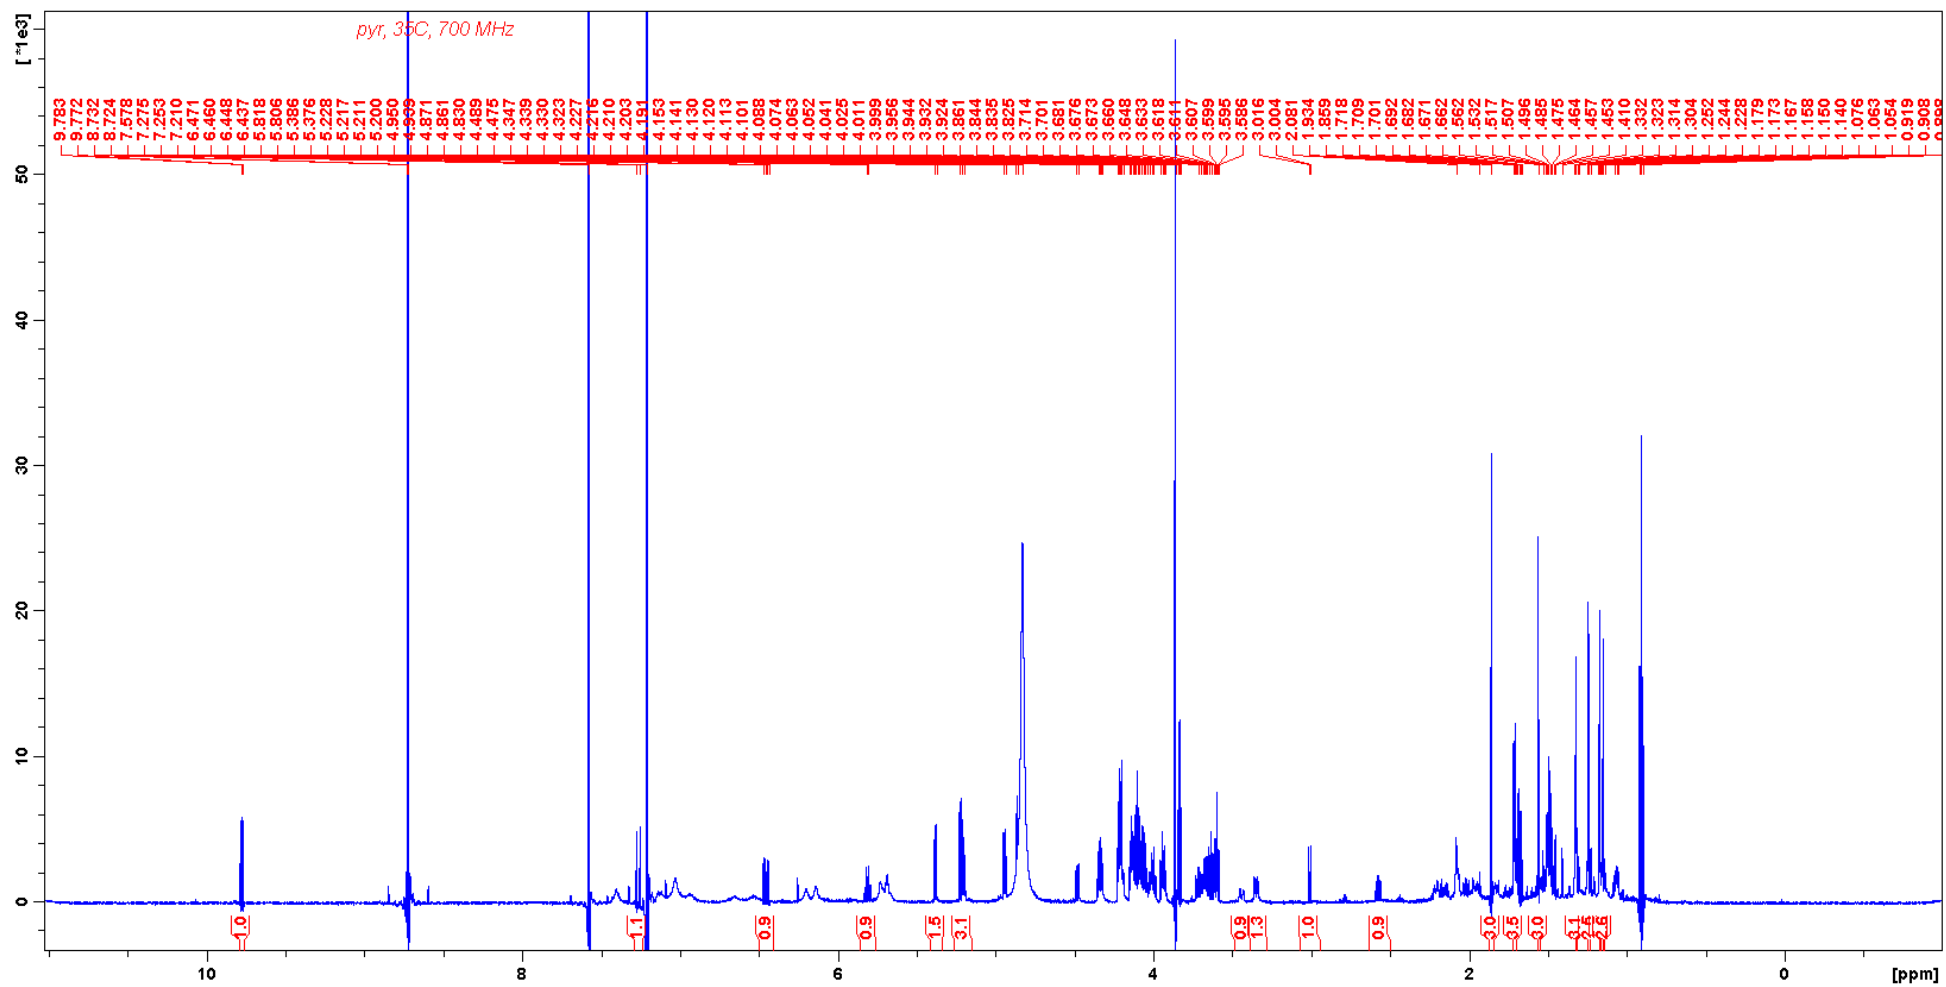

Figure S5.  $^{13}\text{C}$  NMR spectrum of pacificusoside A (**1**) in  $\text{C}_5\text{D}_5\text{N}$ .

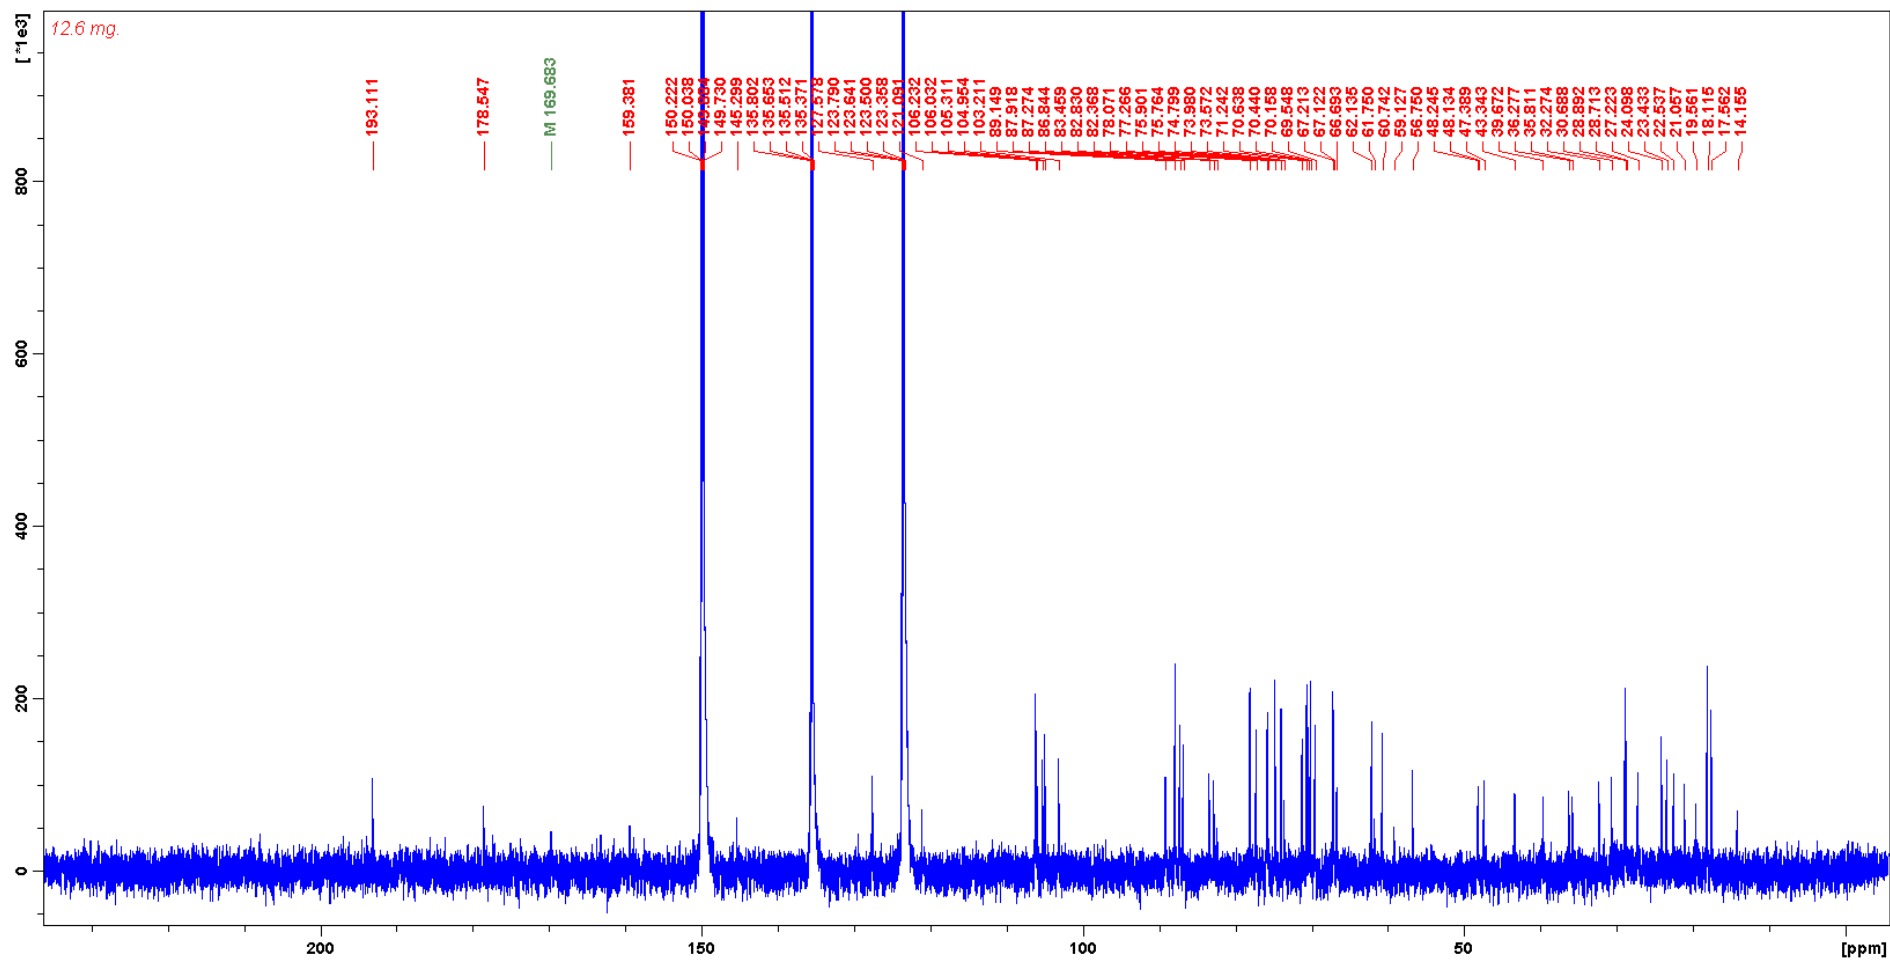

Figure S6.  $^1\text{H}$ - $^1\text{H}$  COSY spectrum of pacificusoside A (1) in  $\text{C}_5\text{D}_5\text{N}$ .

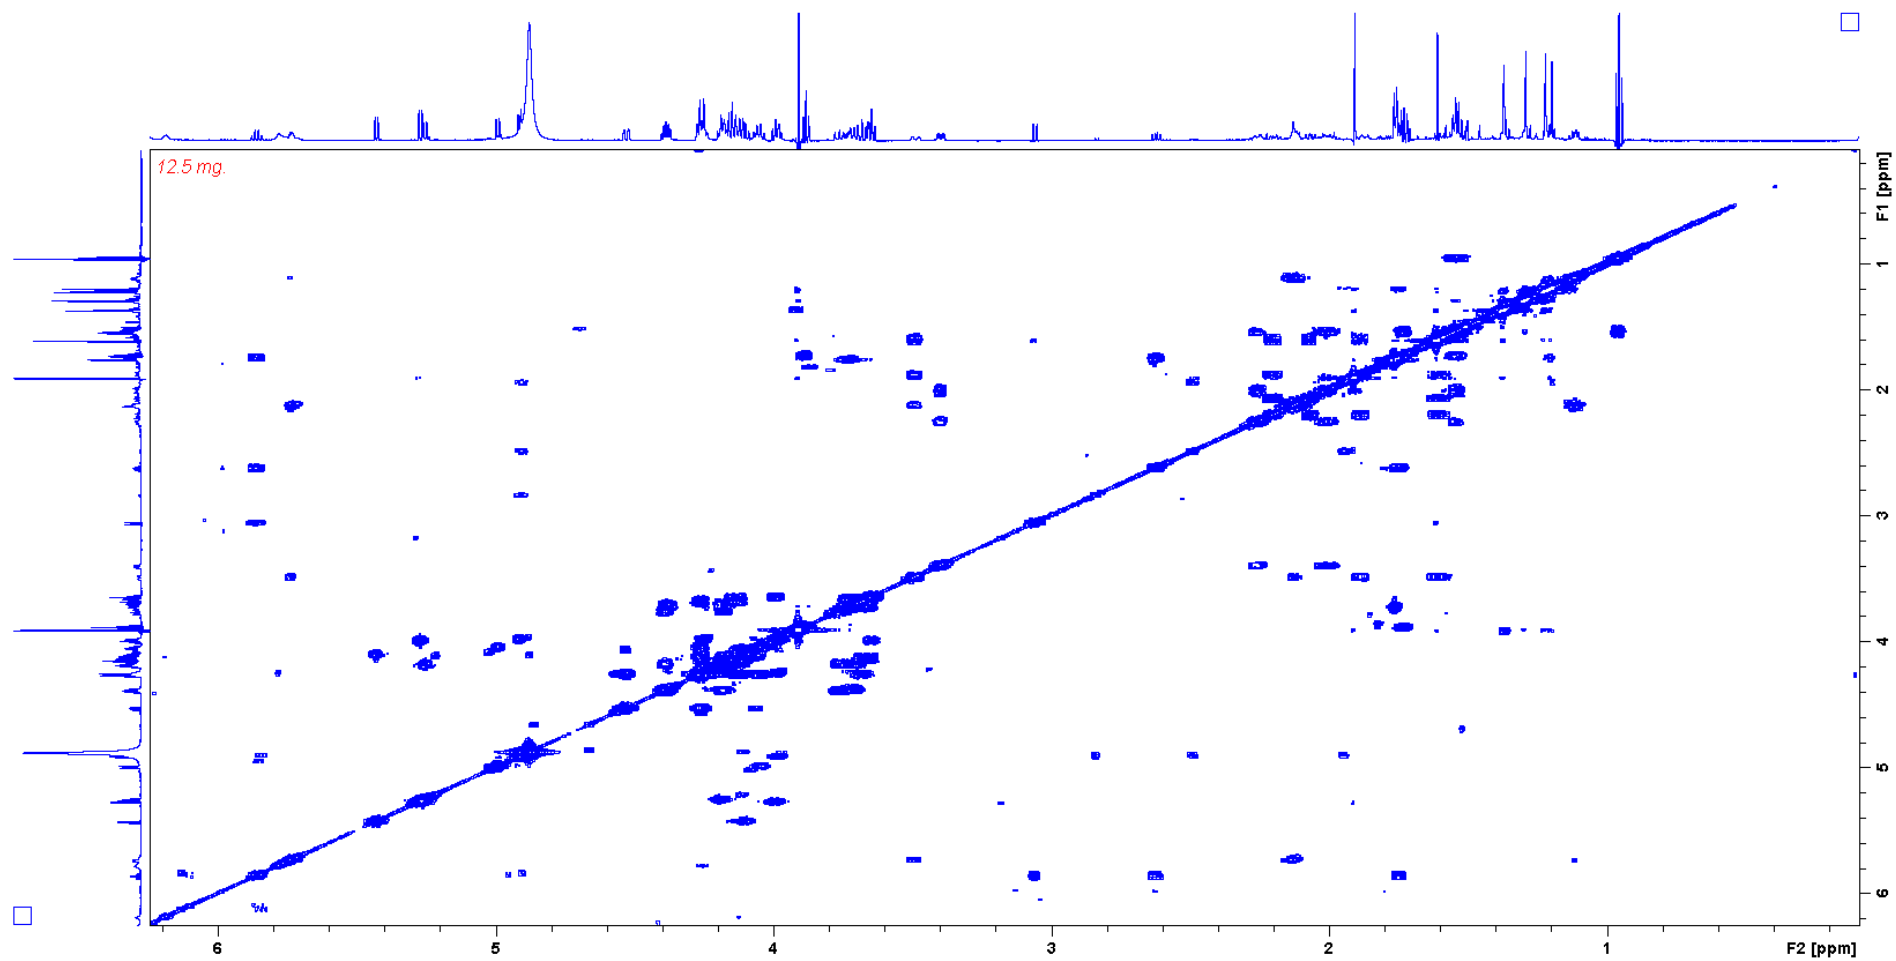



Figure S7. HSQC spectrum of pacificusoside A (**1**) in C<sub>5</sub>D<sub>5</sub>N.

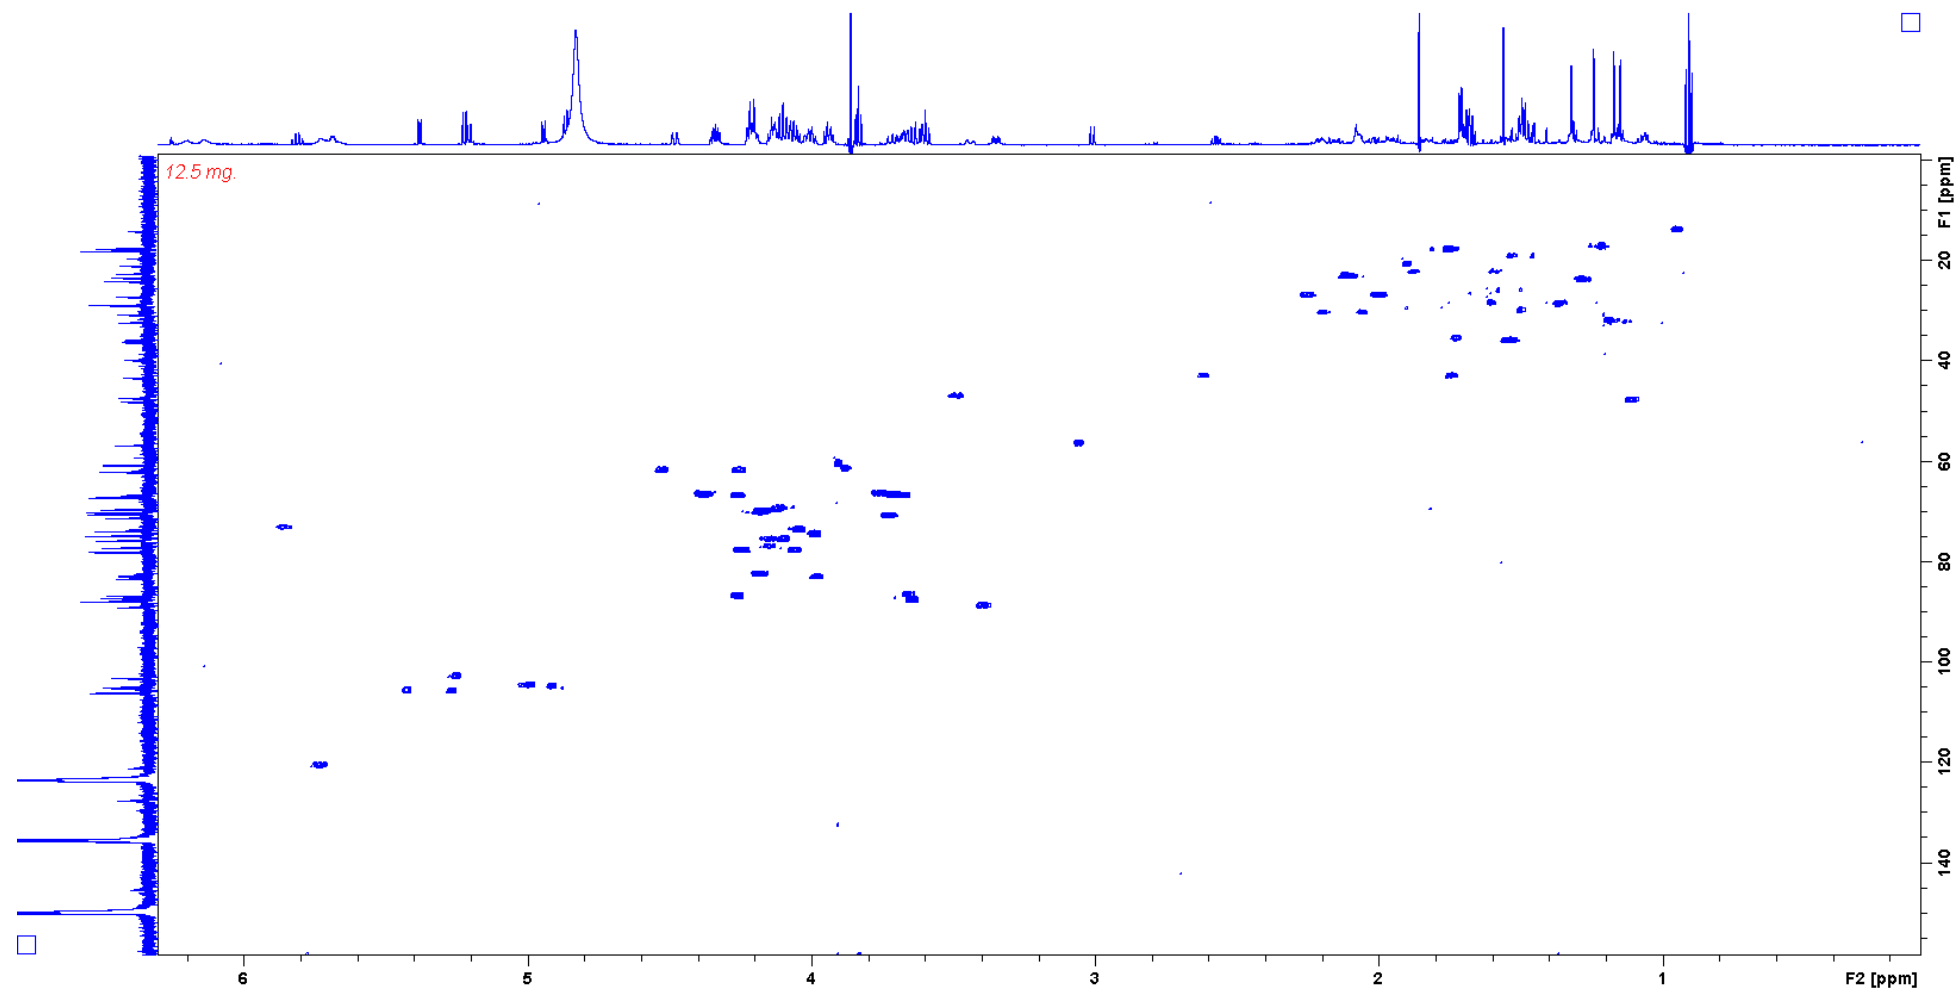

Figure S8. HMBC spectrum of pacificusoside A (1) in C<sub>5</sub>D<sub>5</sub>N.

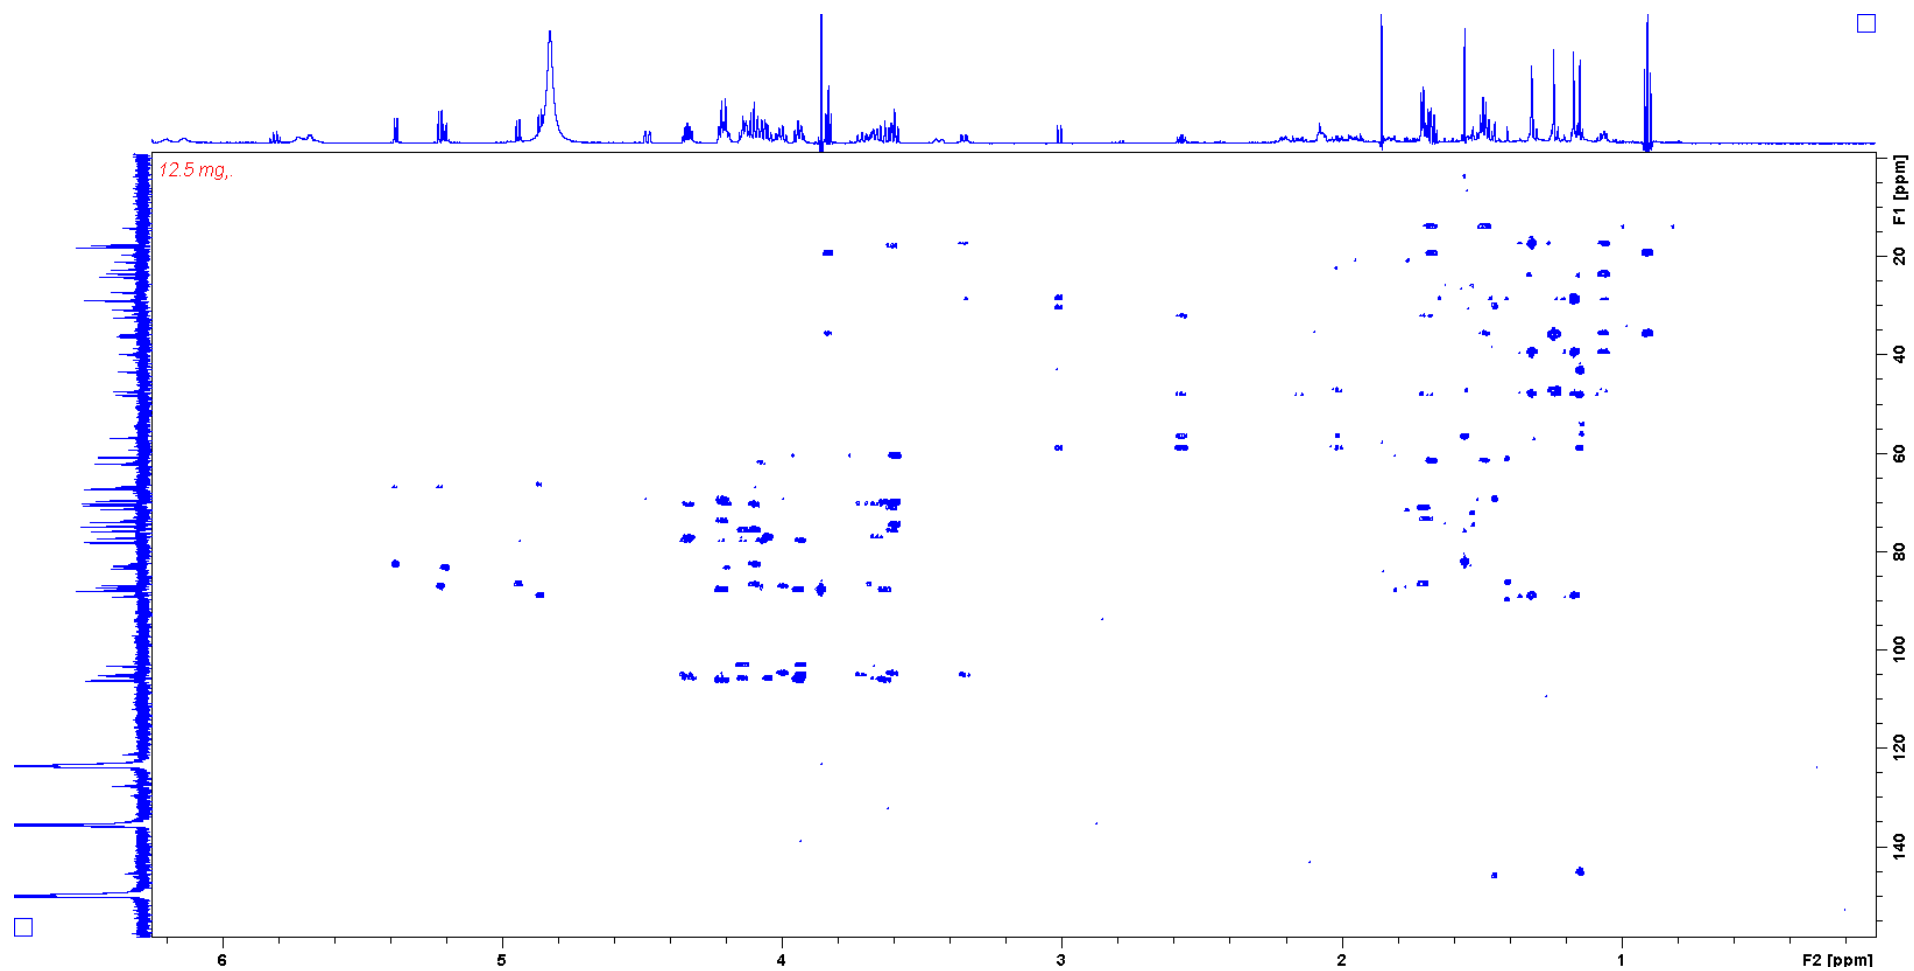

Figure S9. ROESY spectrum of pacificusoside A (1) in  $C_5D_5N$ .

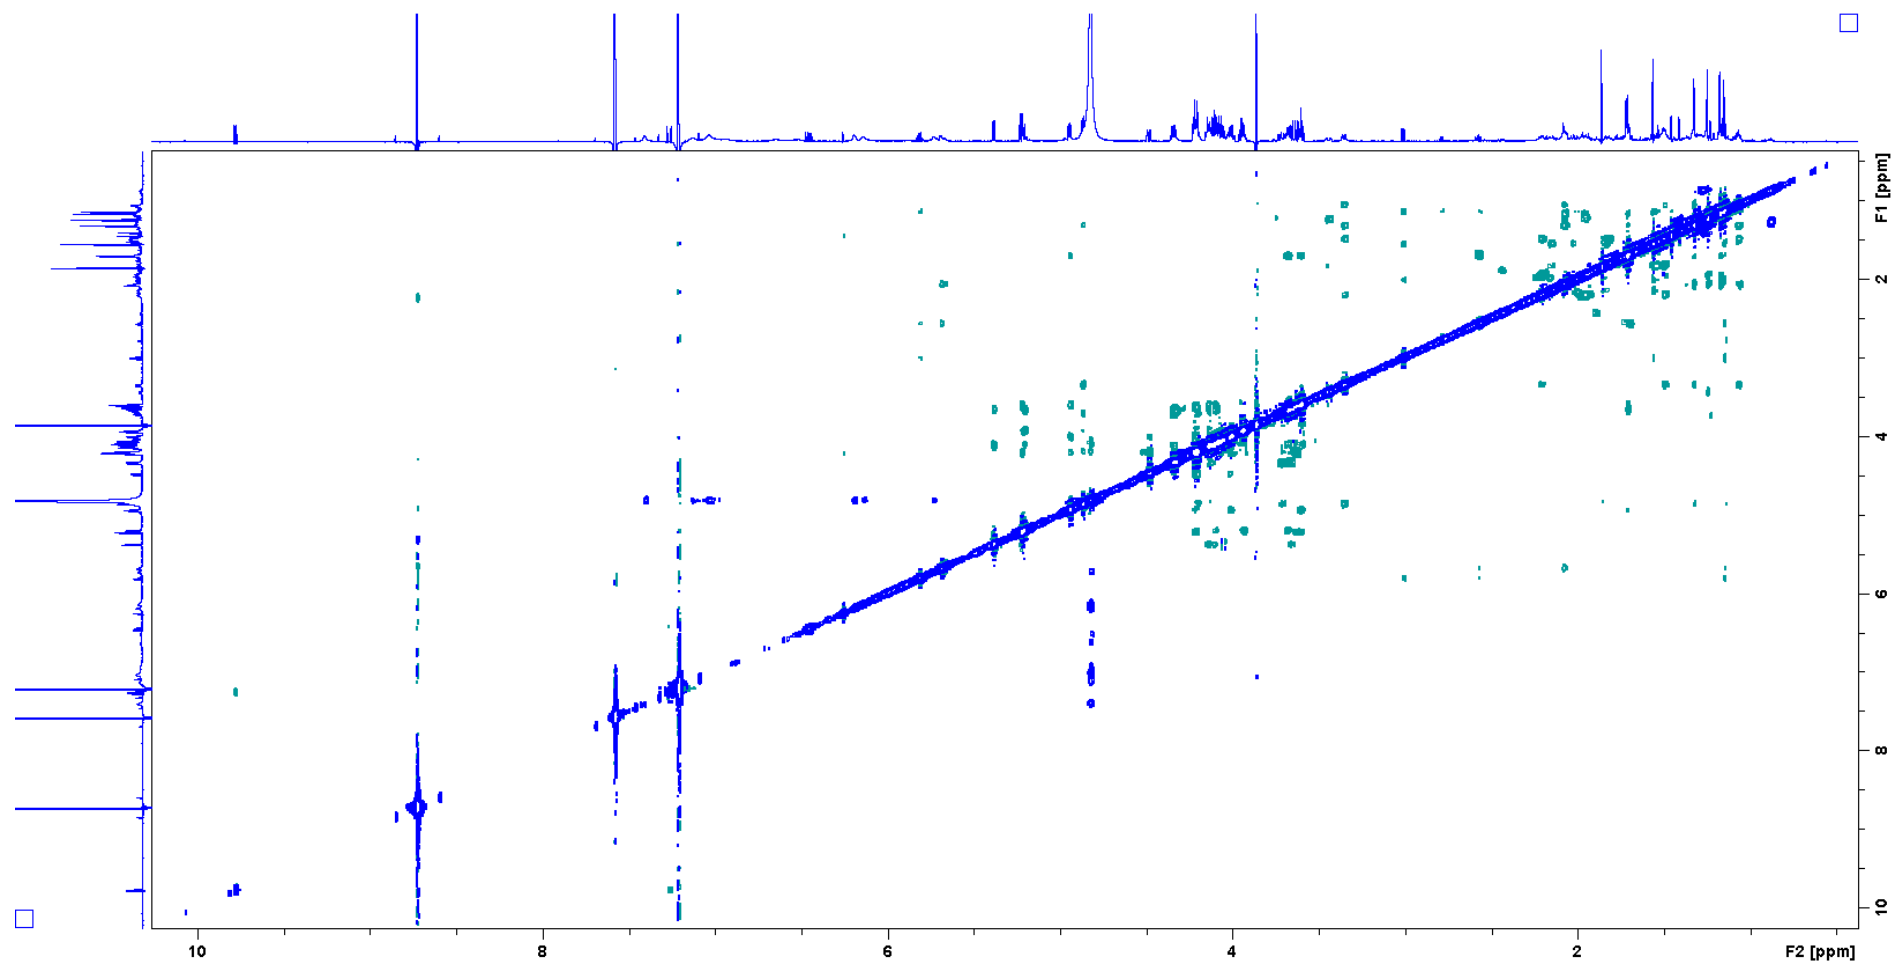

Figure S10. (-)HRESIMS spectrum of pacificusoside B (2).

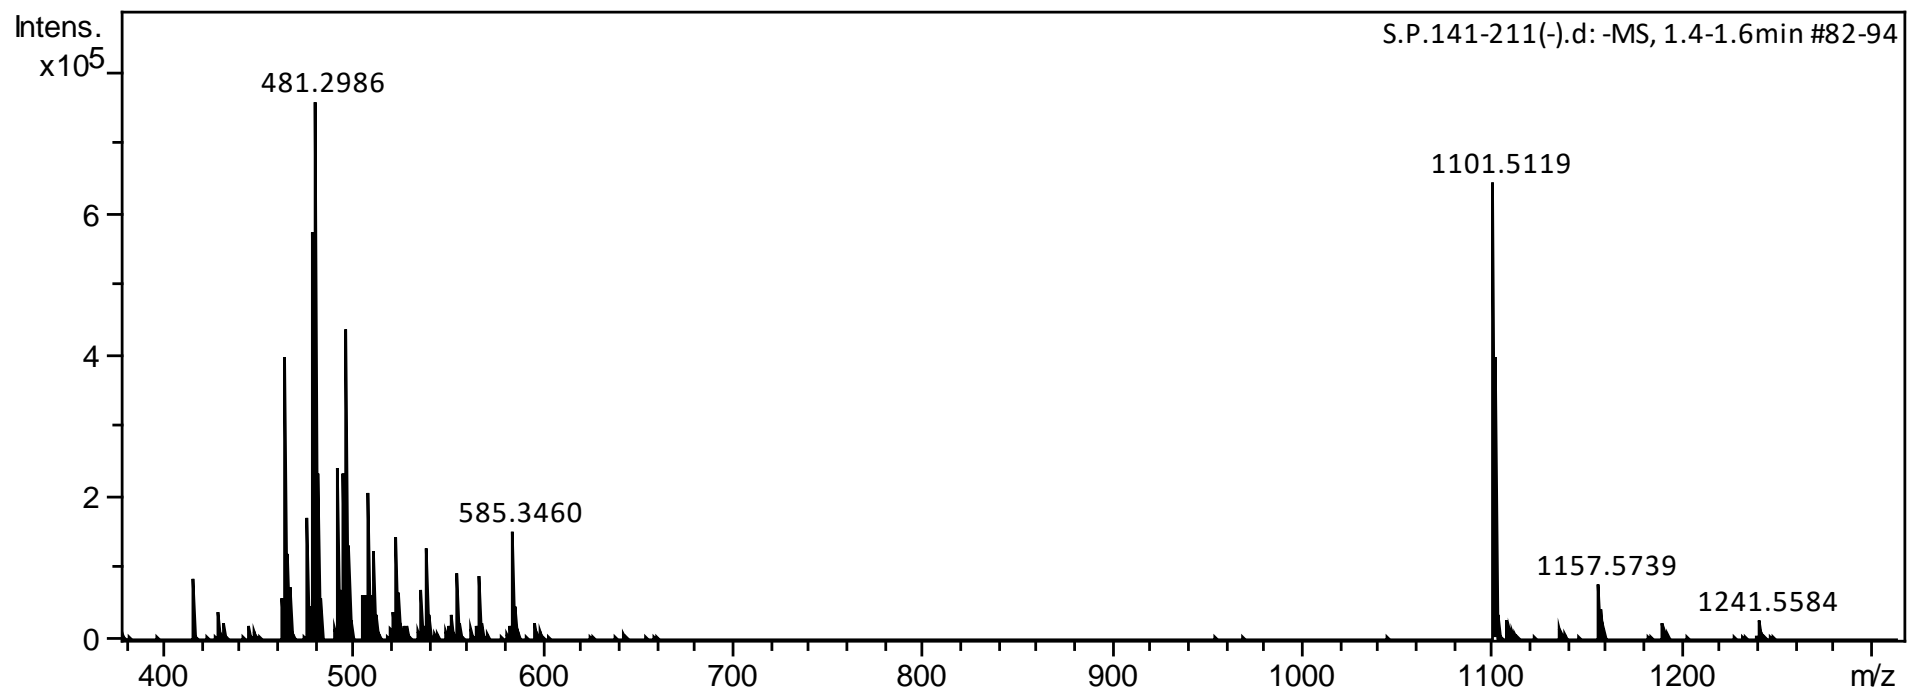

Figure S11. IR spectrum of pacificusoside B (2) in KBr.

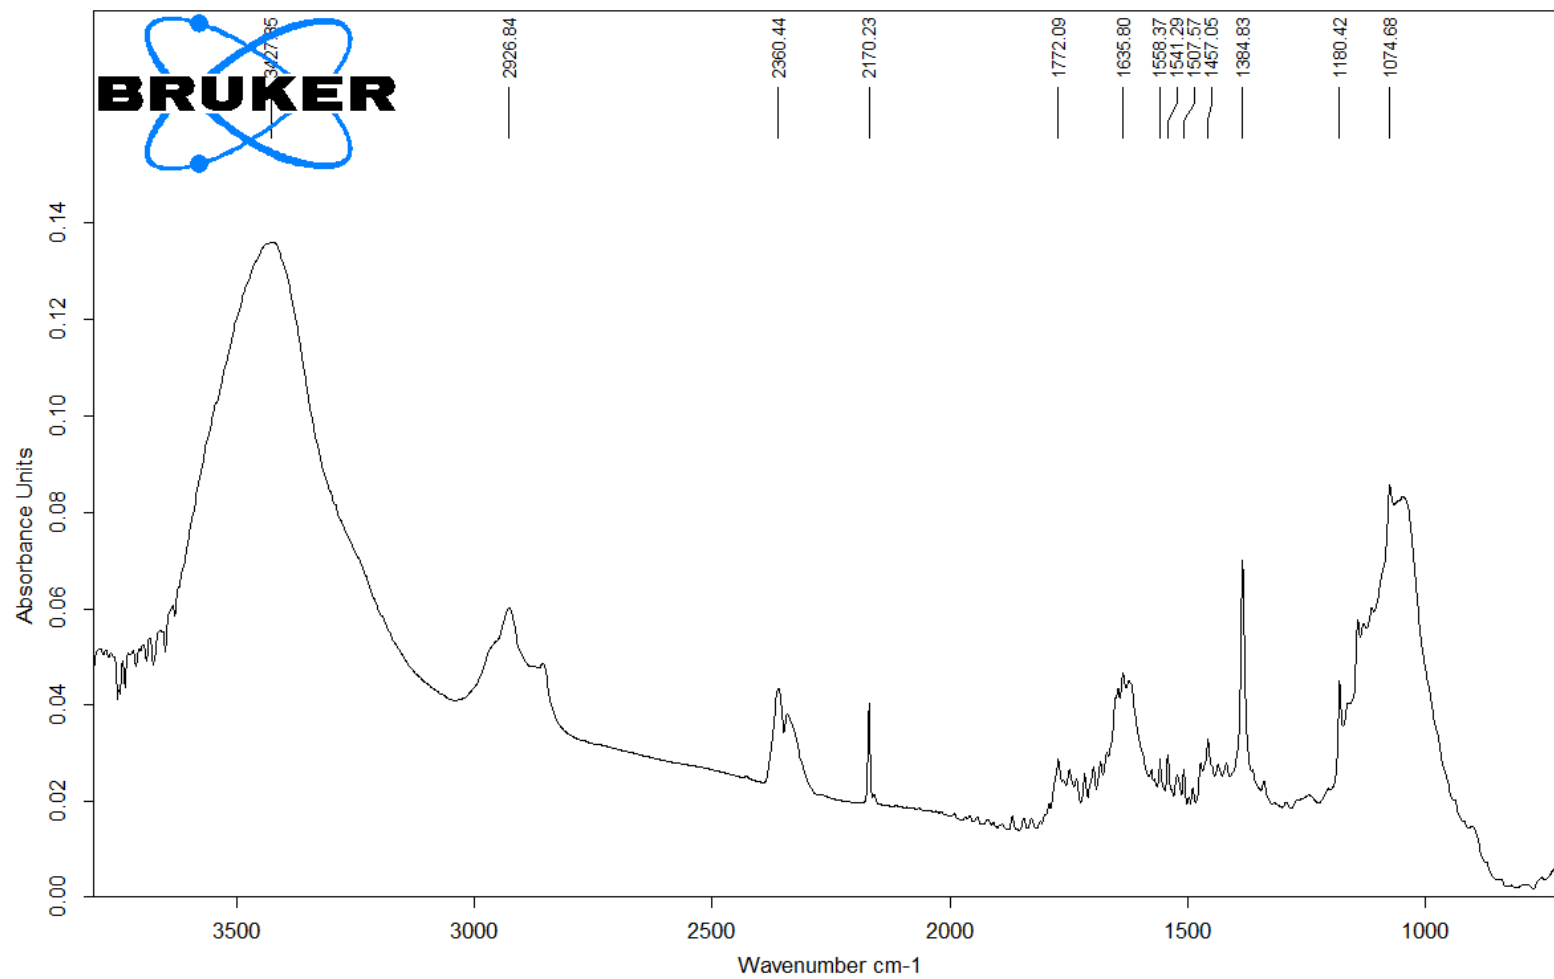

Figure S12.  $^1\text{H}$  NMR spectrum of pacificusoside B (**2**) in  $\text{C}_5\text{D}_5\text{N}$ .

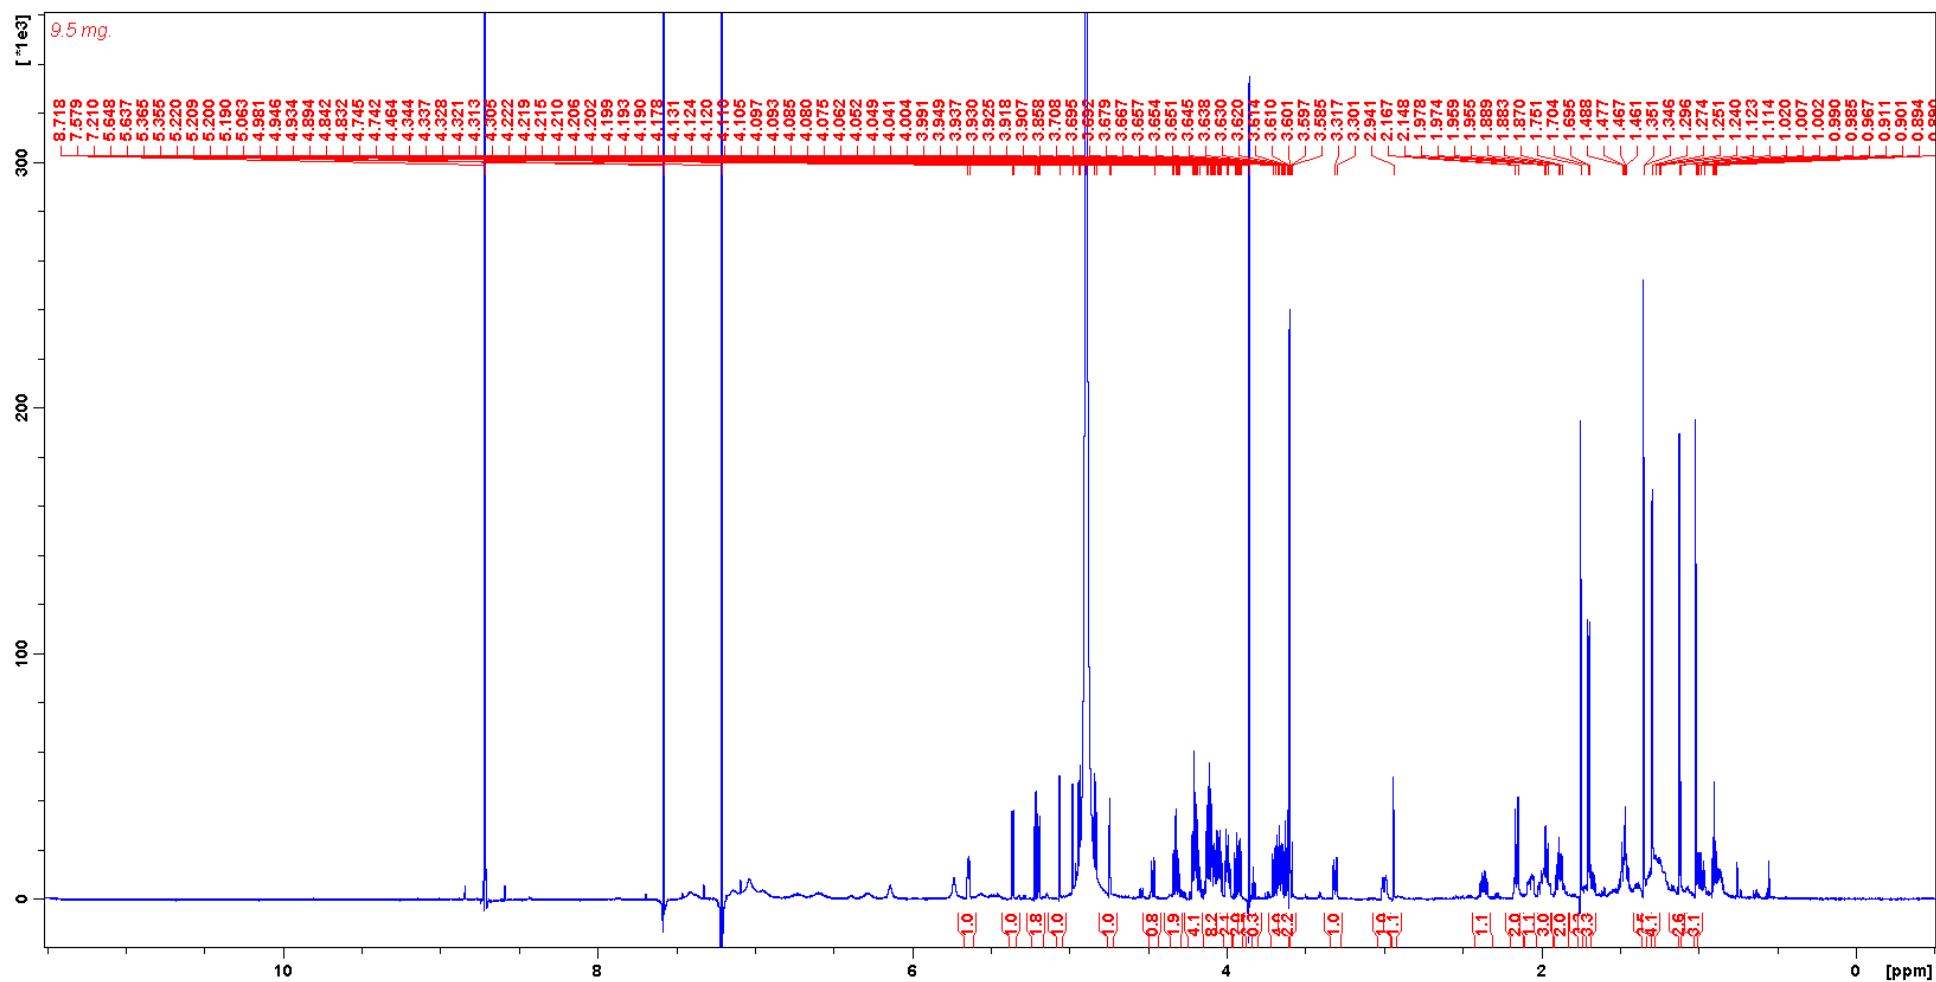

Figure S13.  $^{13}\text{C}$  NMR spectrum of pacificusoside B (2) in  $\text{C}_5\text{D}_5\text{N}$ .

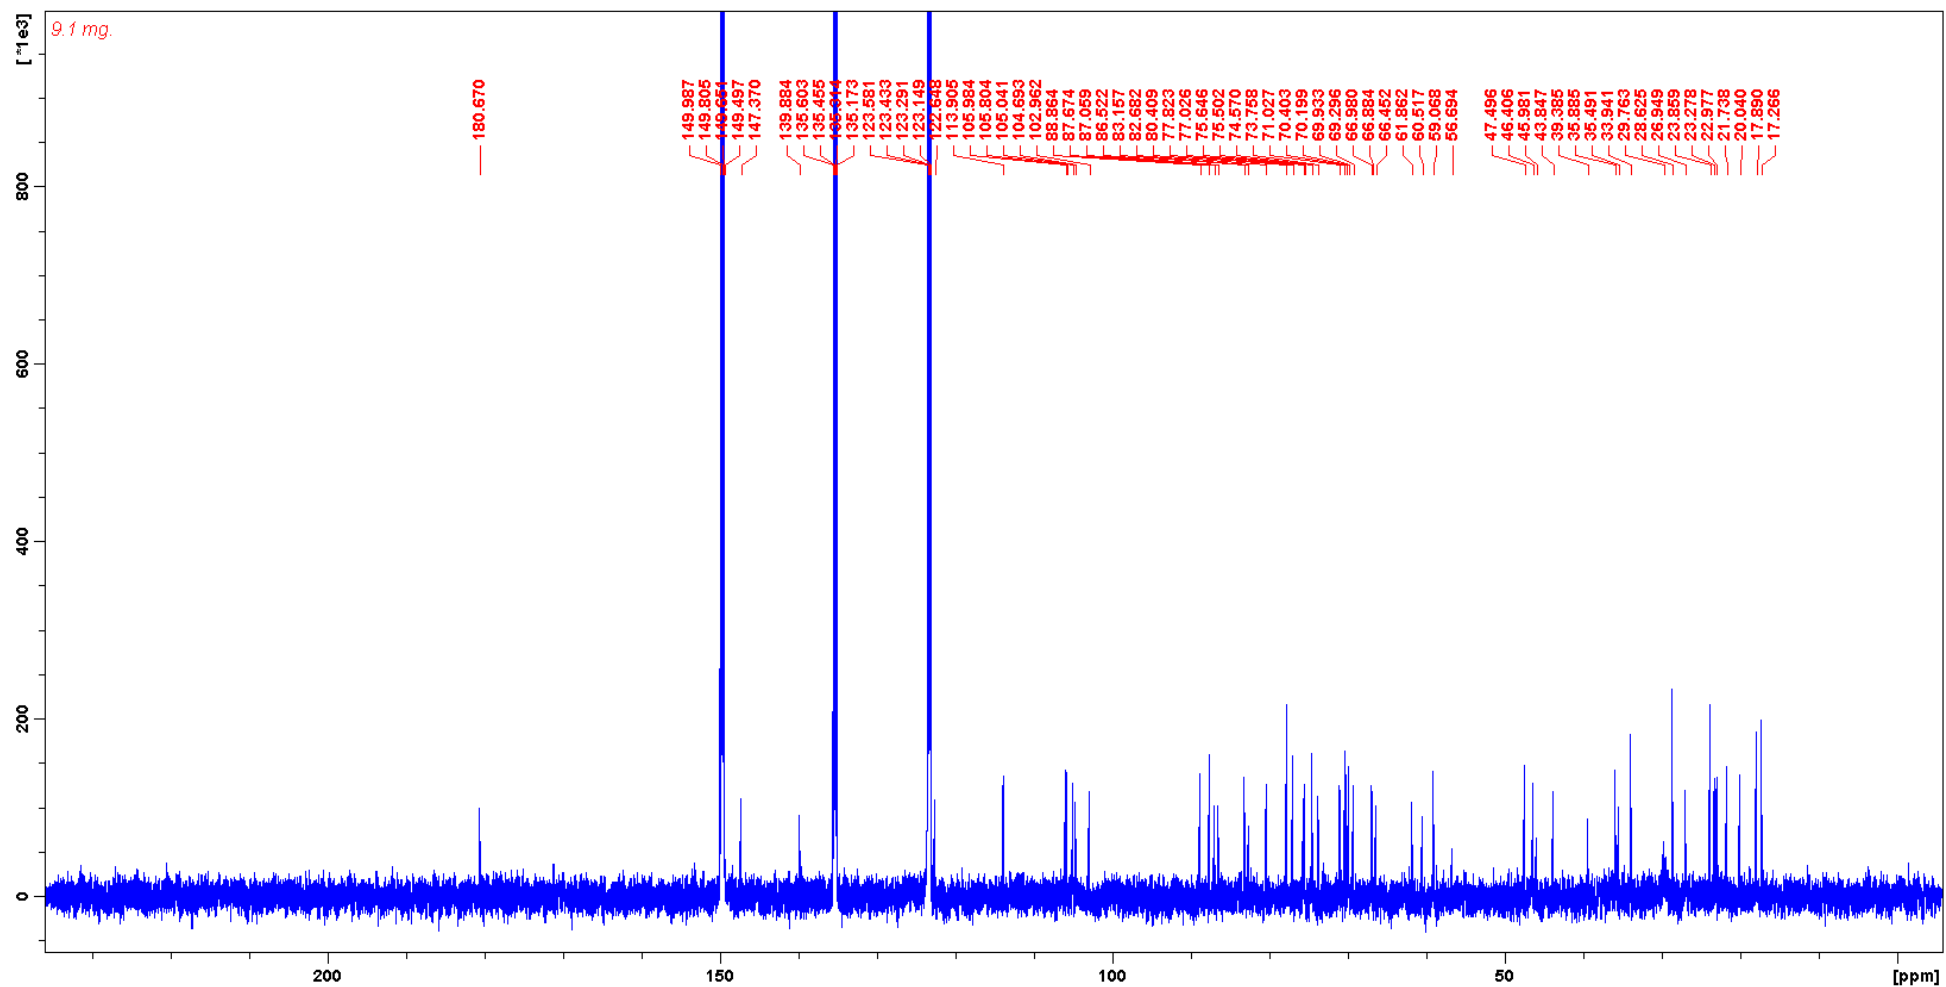

Figure S14.  $^1\text{H}$ - $^1\text{H}$  COSY spectrum of pacificusoside B (2) in  $\text{C}_5\text{D}_5\text{N}$ .

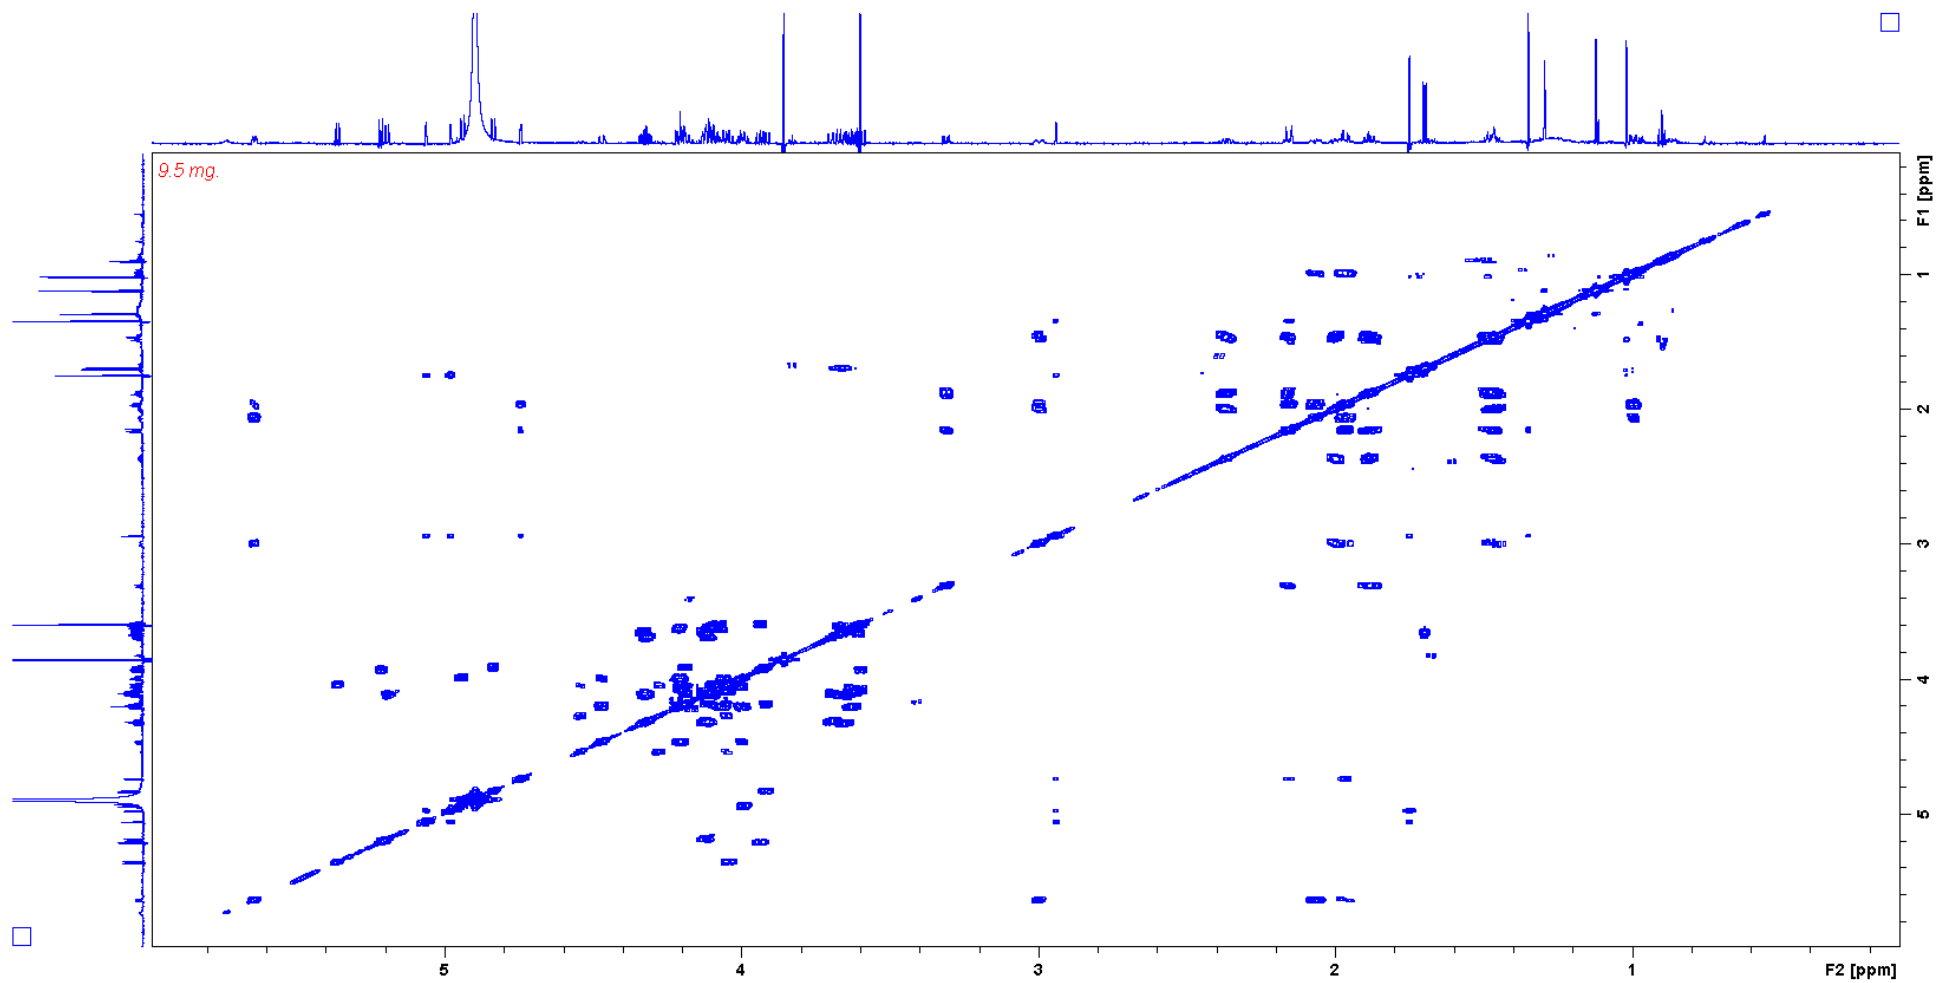



Figure S15. HSQC spectrum of pacificusoside B (2) in  $C_5D_5N$ .

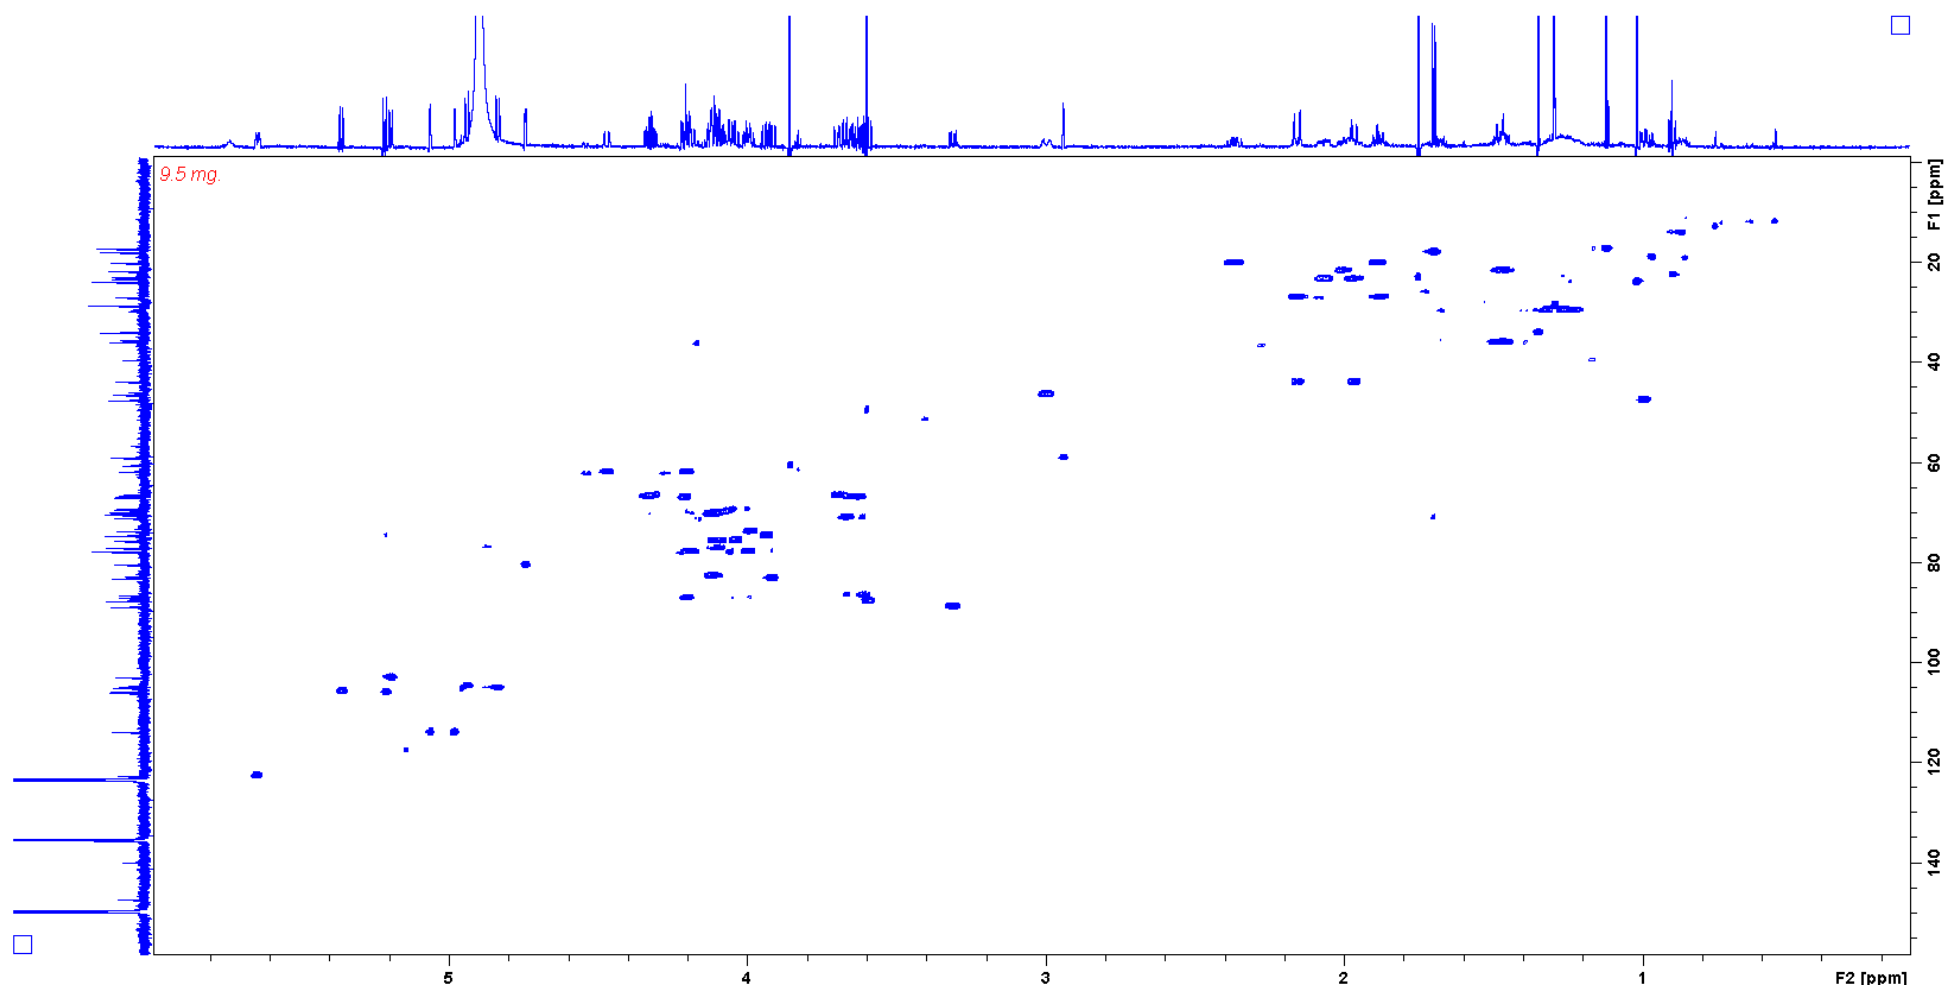

Figure S16. HMBC spectrum of pacificusoside B (2) in C<sub>5</sub>D<sub>5</sub>N.

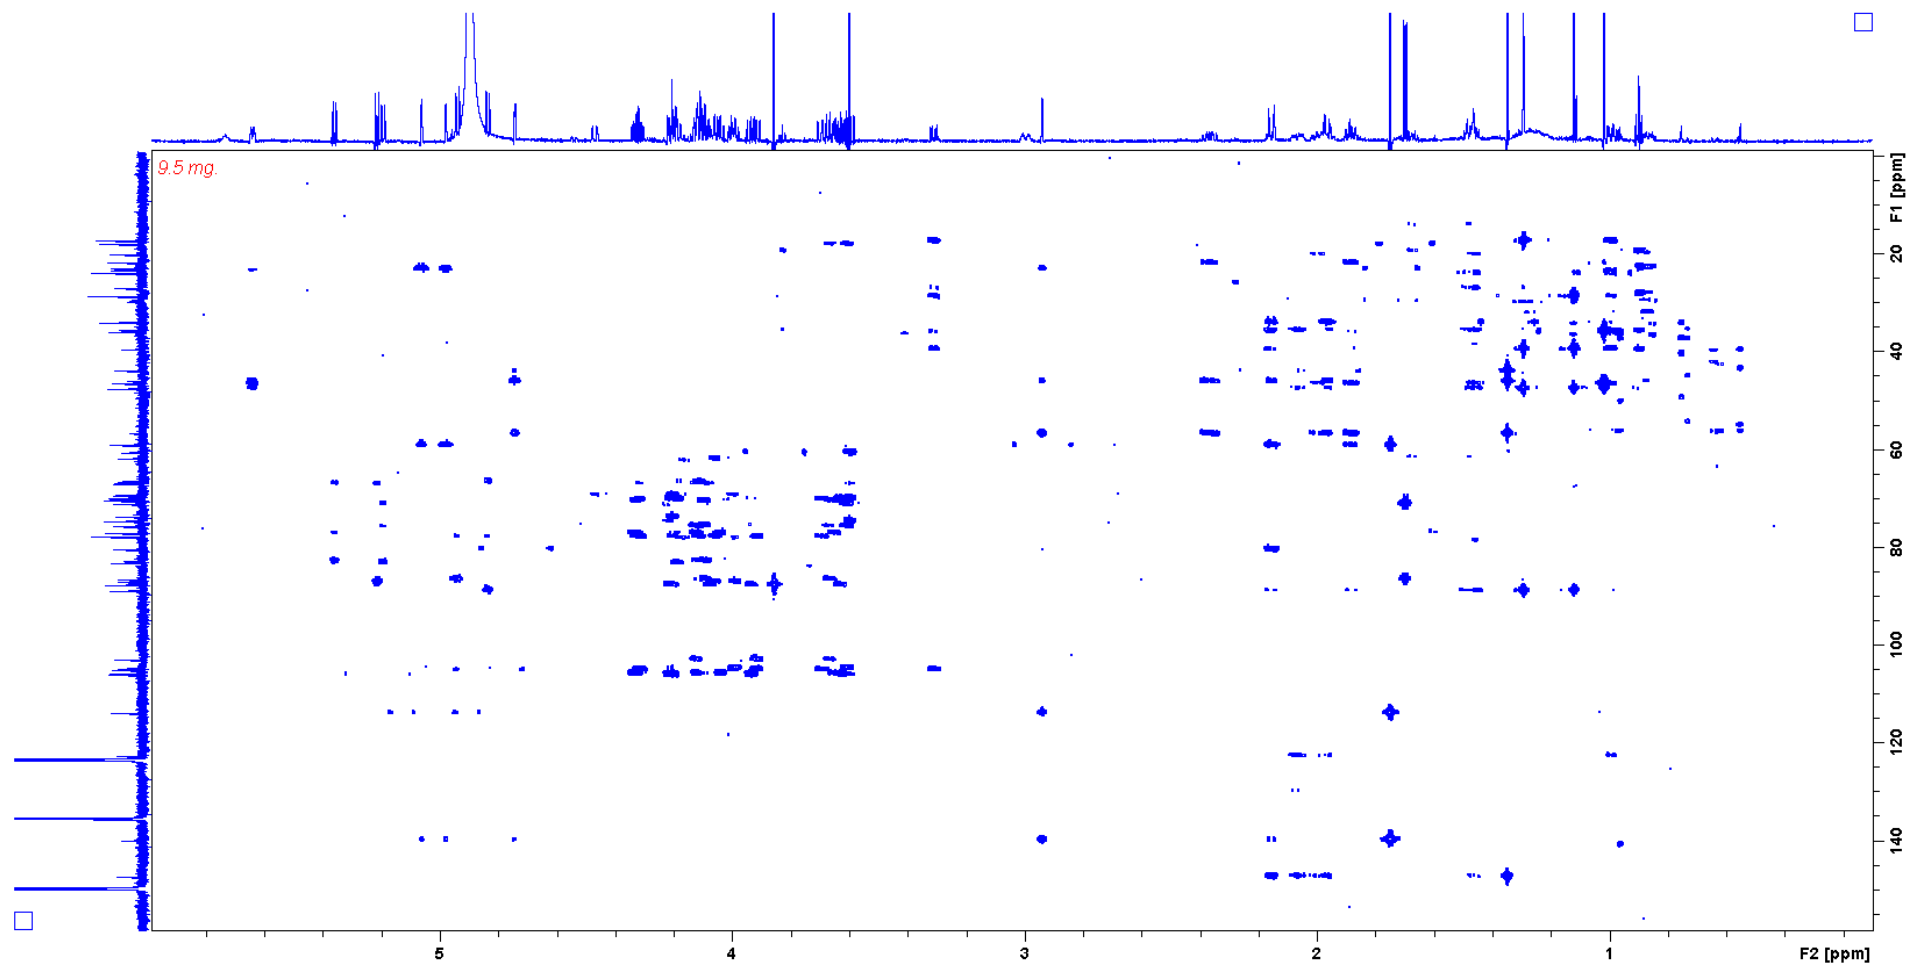

Figure S17. ROESY spectrum of pacificusoside B (2) in  $C_5D_5N$ .

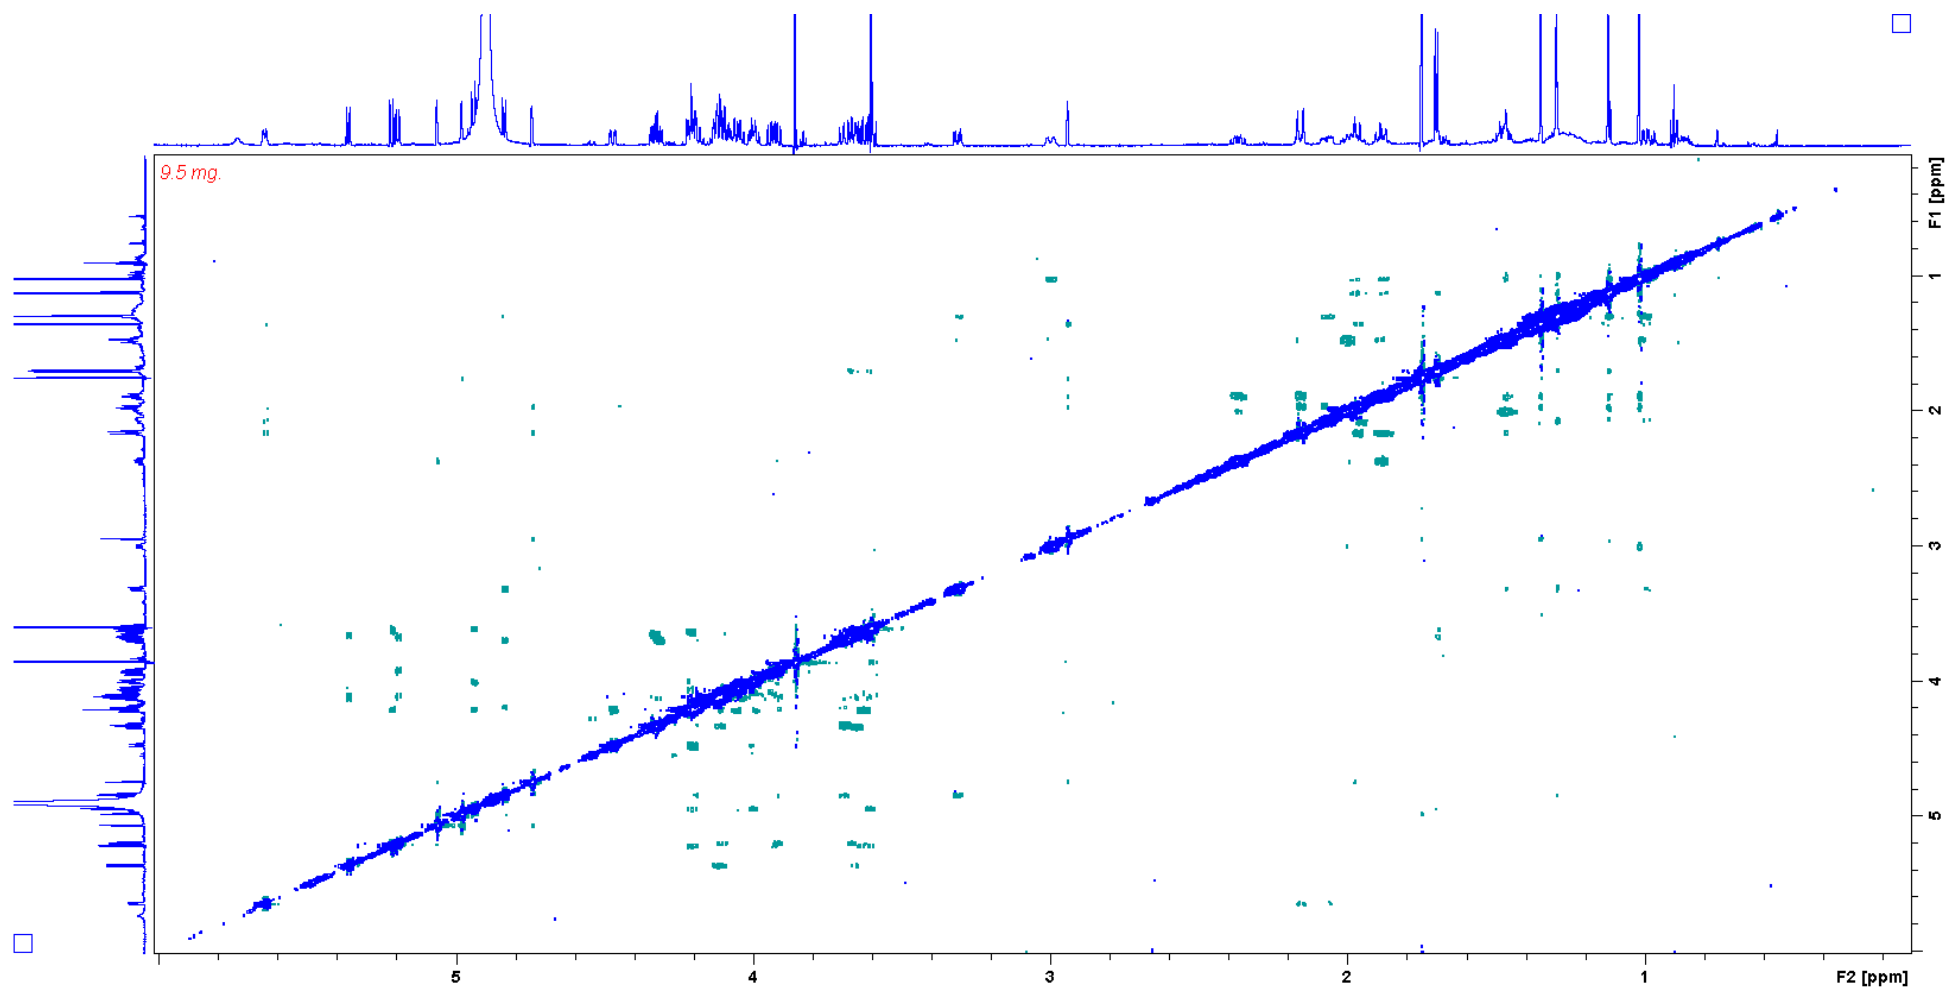

Figure S18. (-)HRESIMS spectrum of pacificusoside C (3).

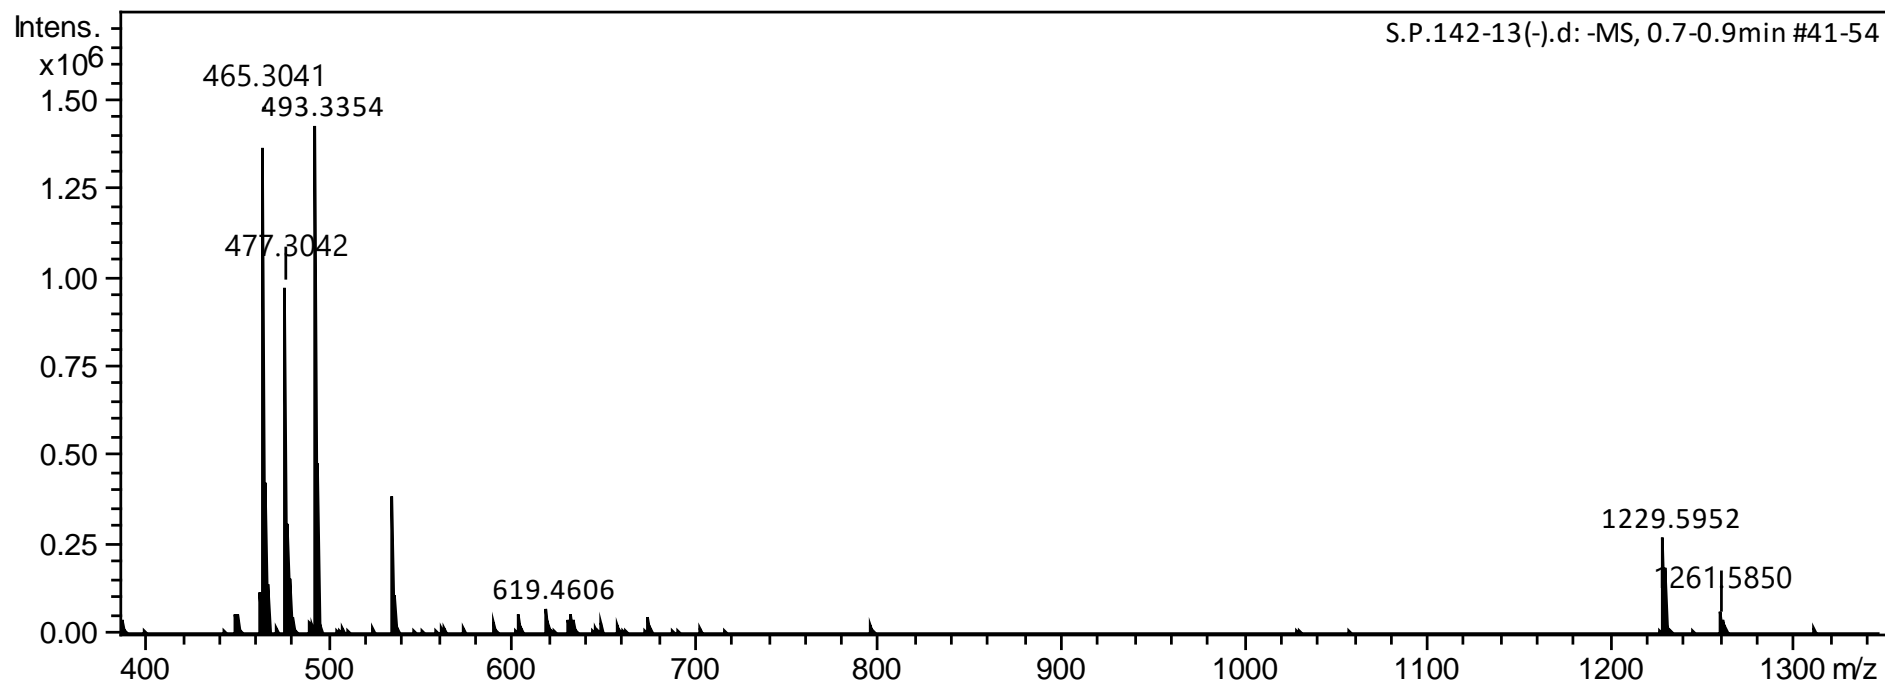

Figure S19. IR spectrum of pacificusoside C (3) in KBr.

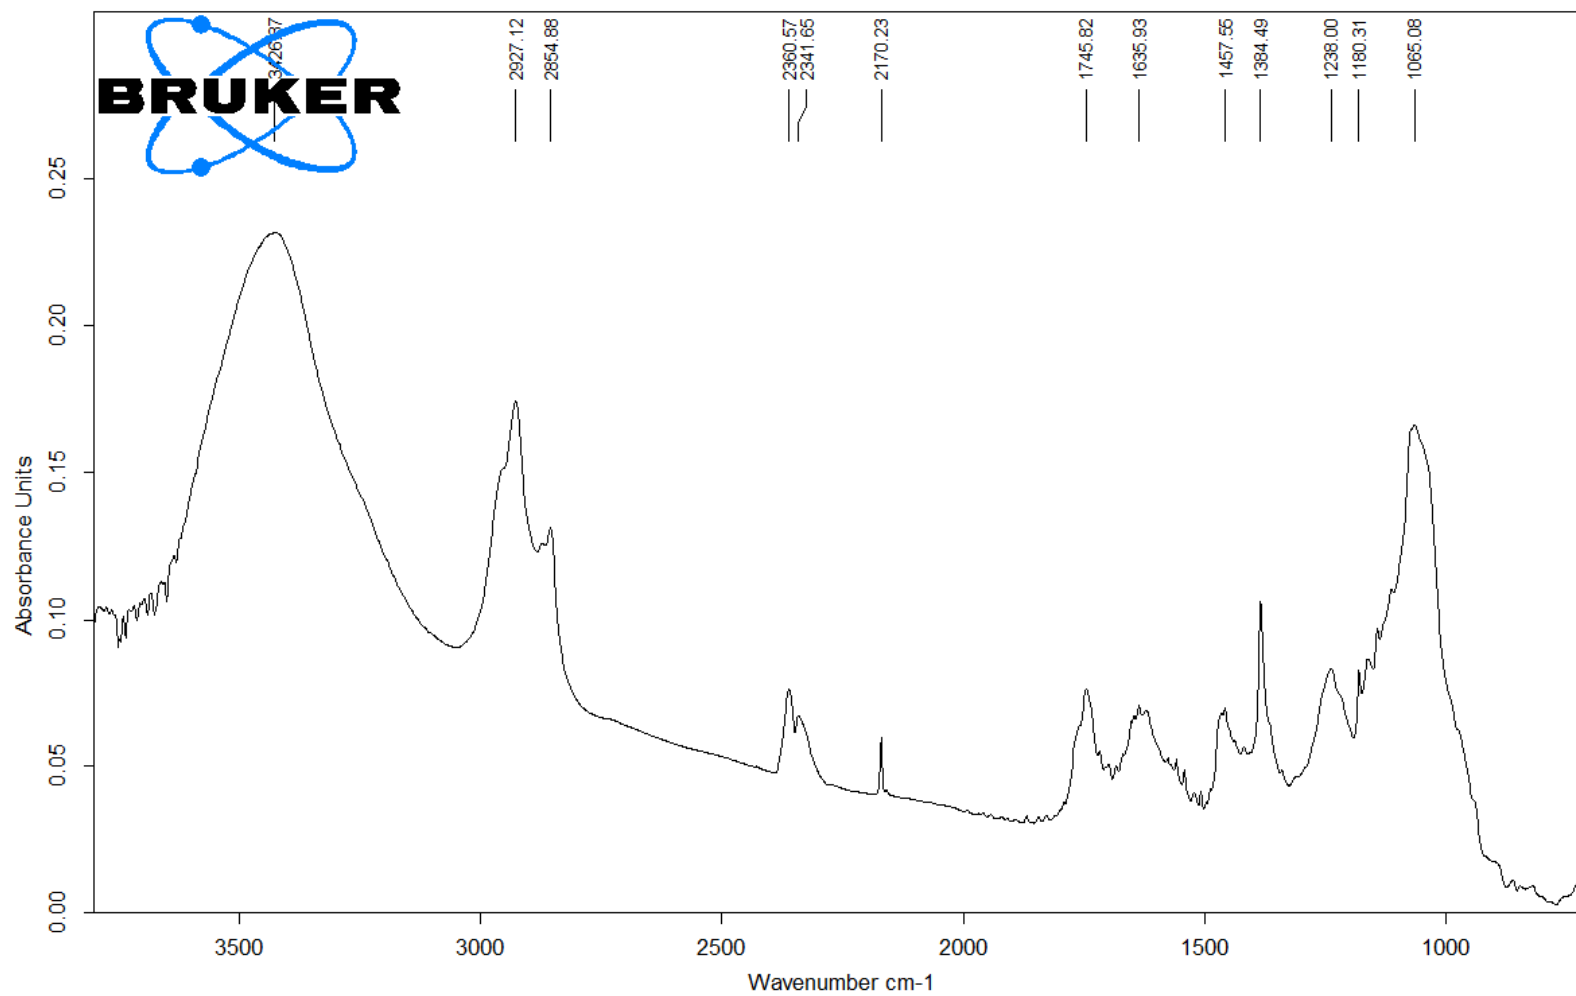

Figure S20.  $^1\text{H}$  NMR spectrum of pacificusoside C (3) in  $\text{C}_5\text{D}_5\text{N}$ .

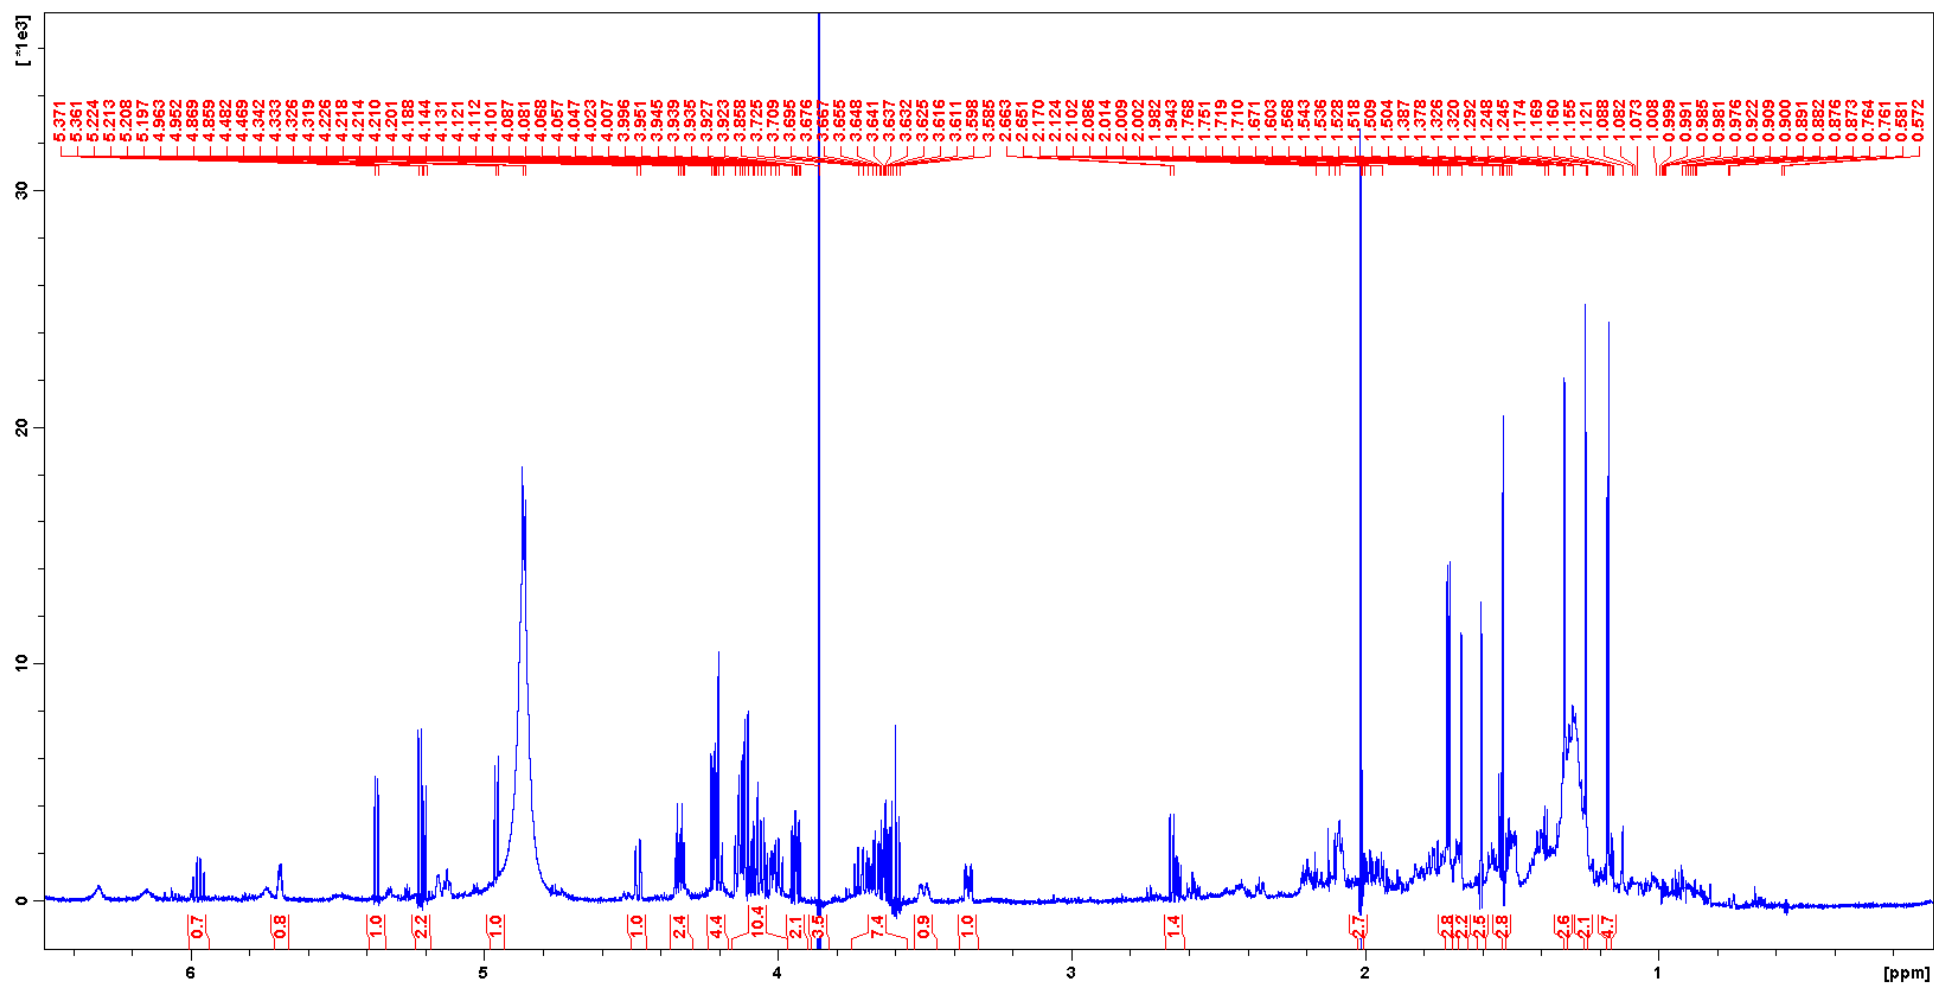

Figure S21.  $^{13}\text{C}$  NMR spectrum of pacificusoside C (3) in  $\text{C}_5\text{D}_5\text{N}$ .

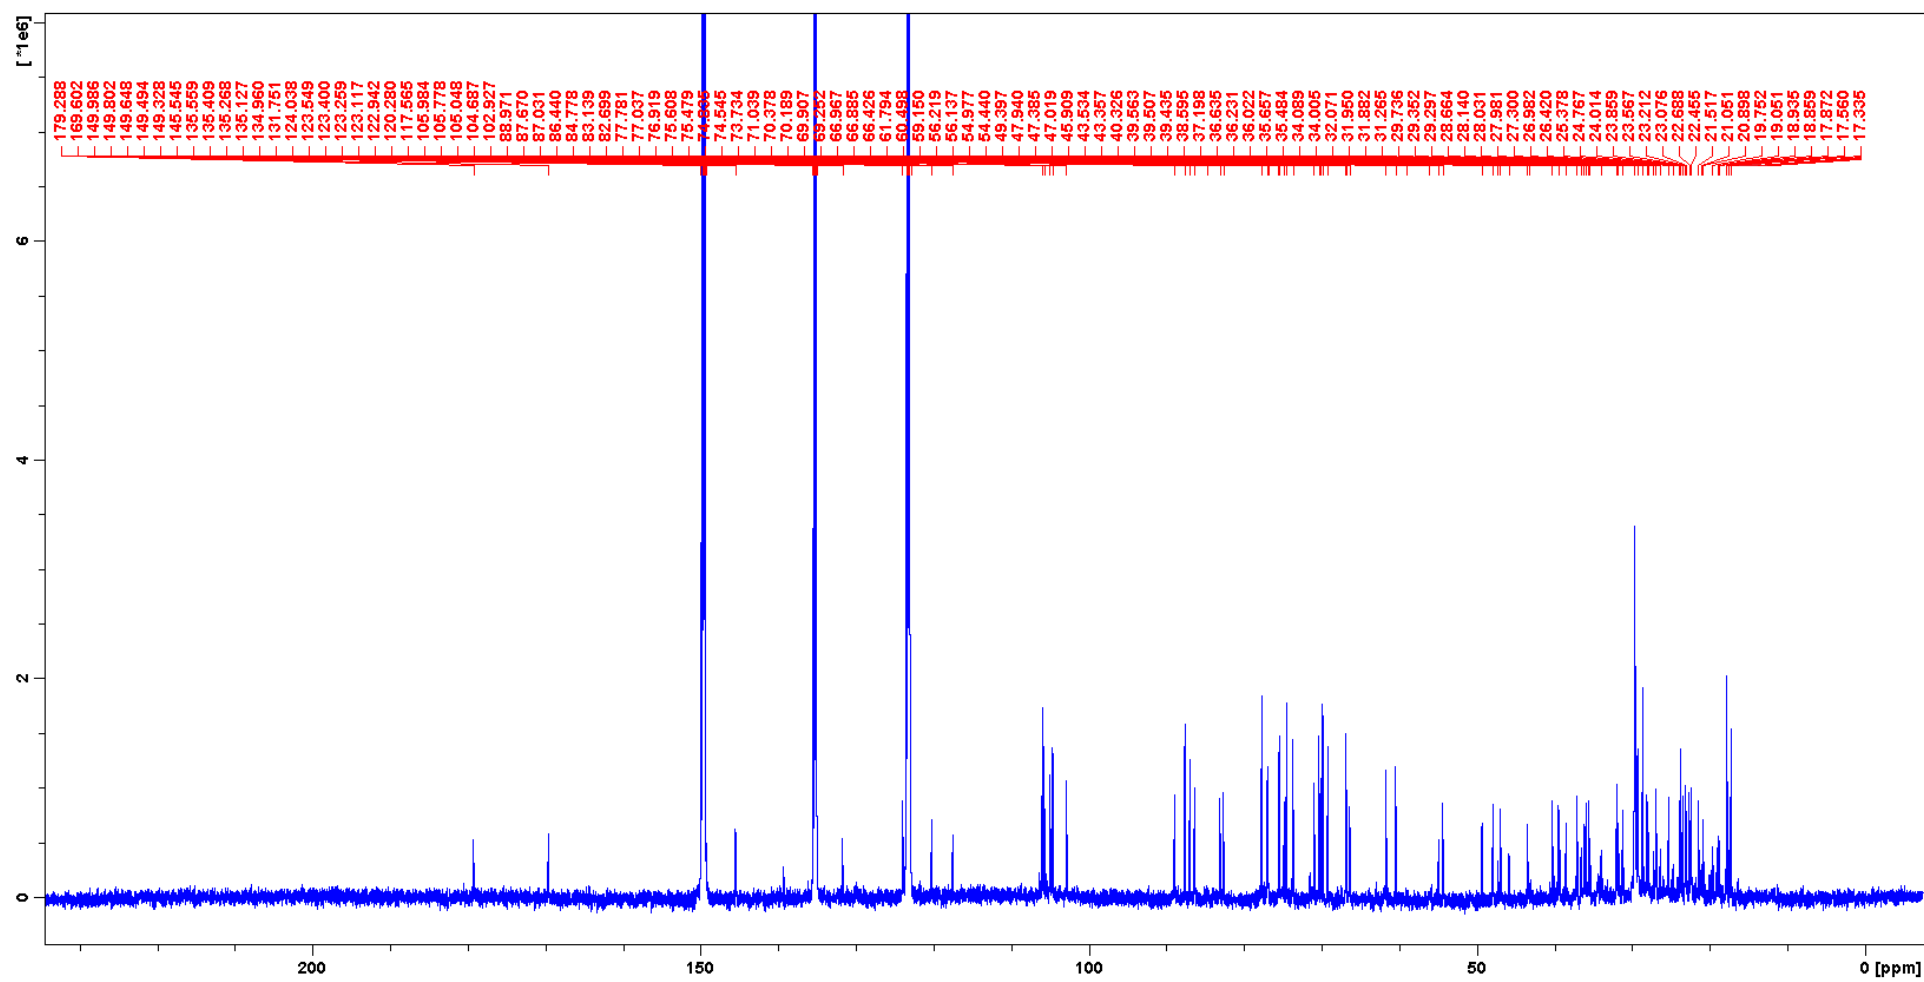

Figure S22.  $^1\text{H}$ - $^1\text{H}$  COSY spectrum of pacificusoside C (3) in  $\text{C}_5\text{D}_5\text{N}$ .

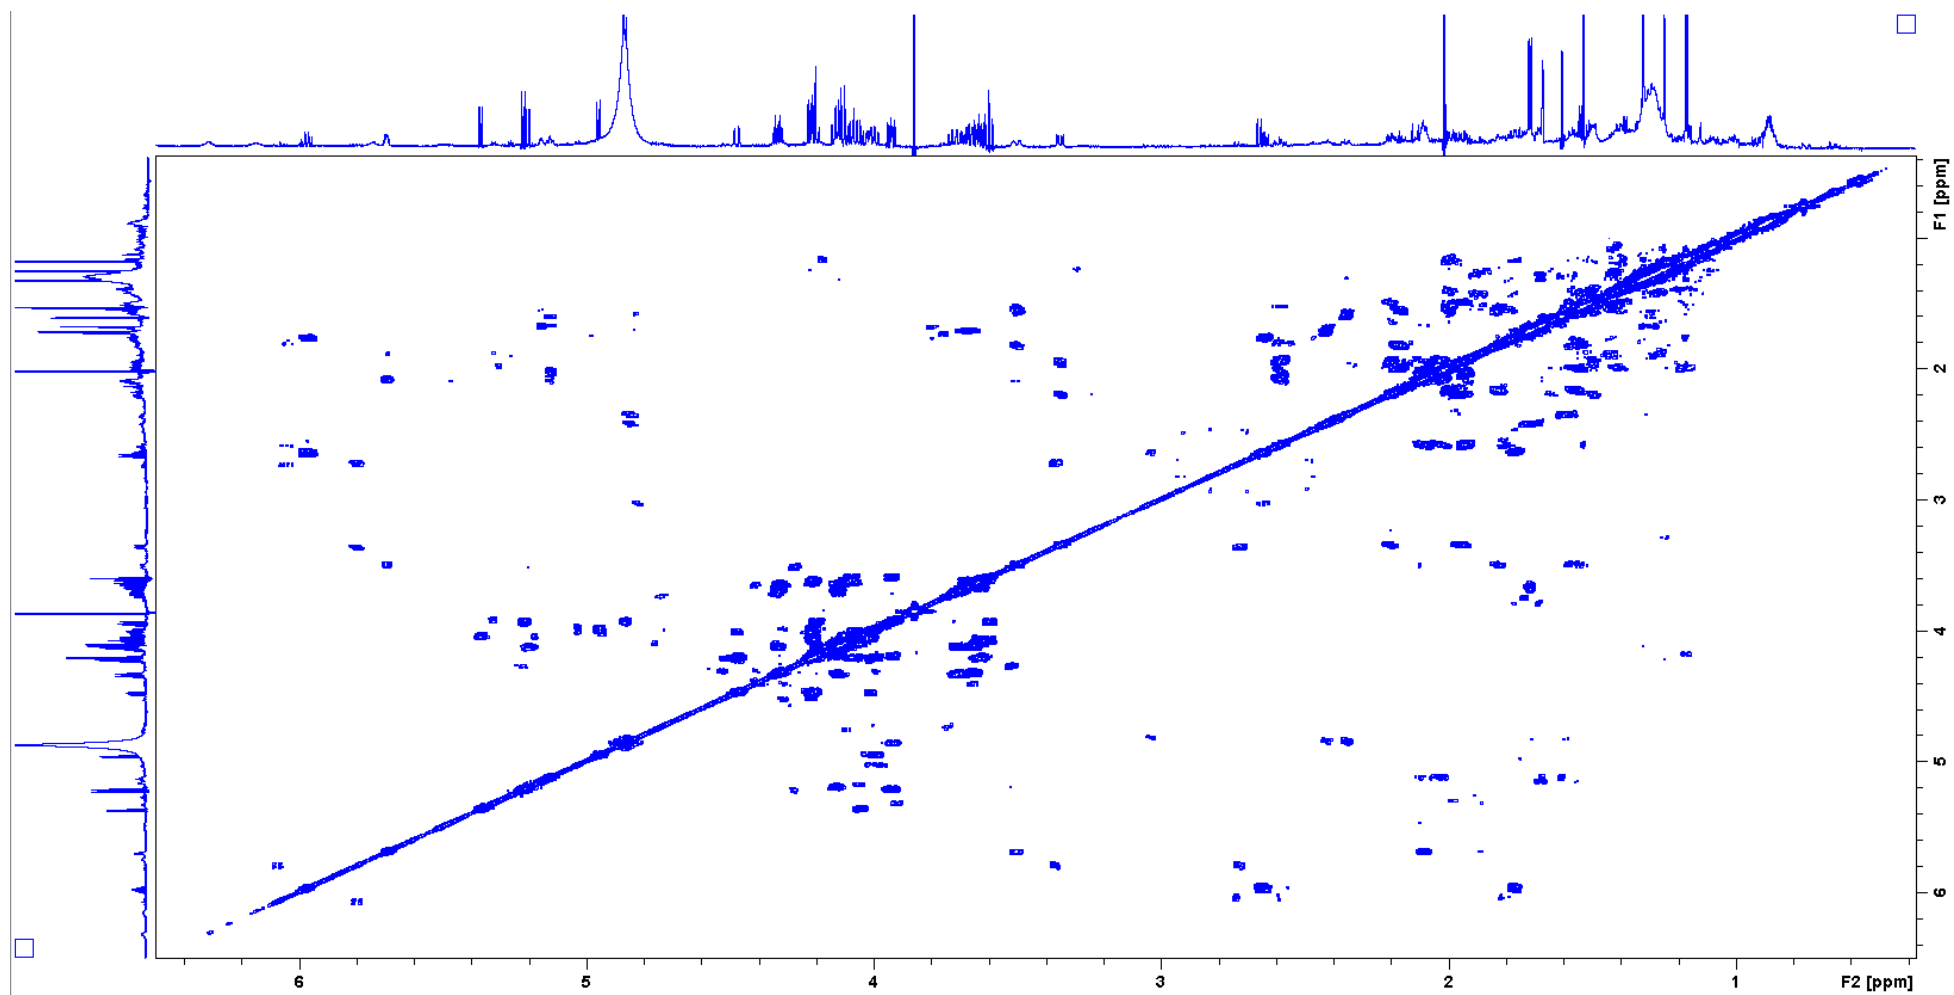



Figure S23. HSQC spectrum of pacificusoside C (3) in  $C_5D_5N$ .

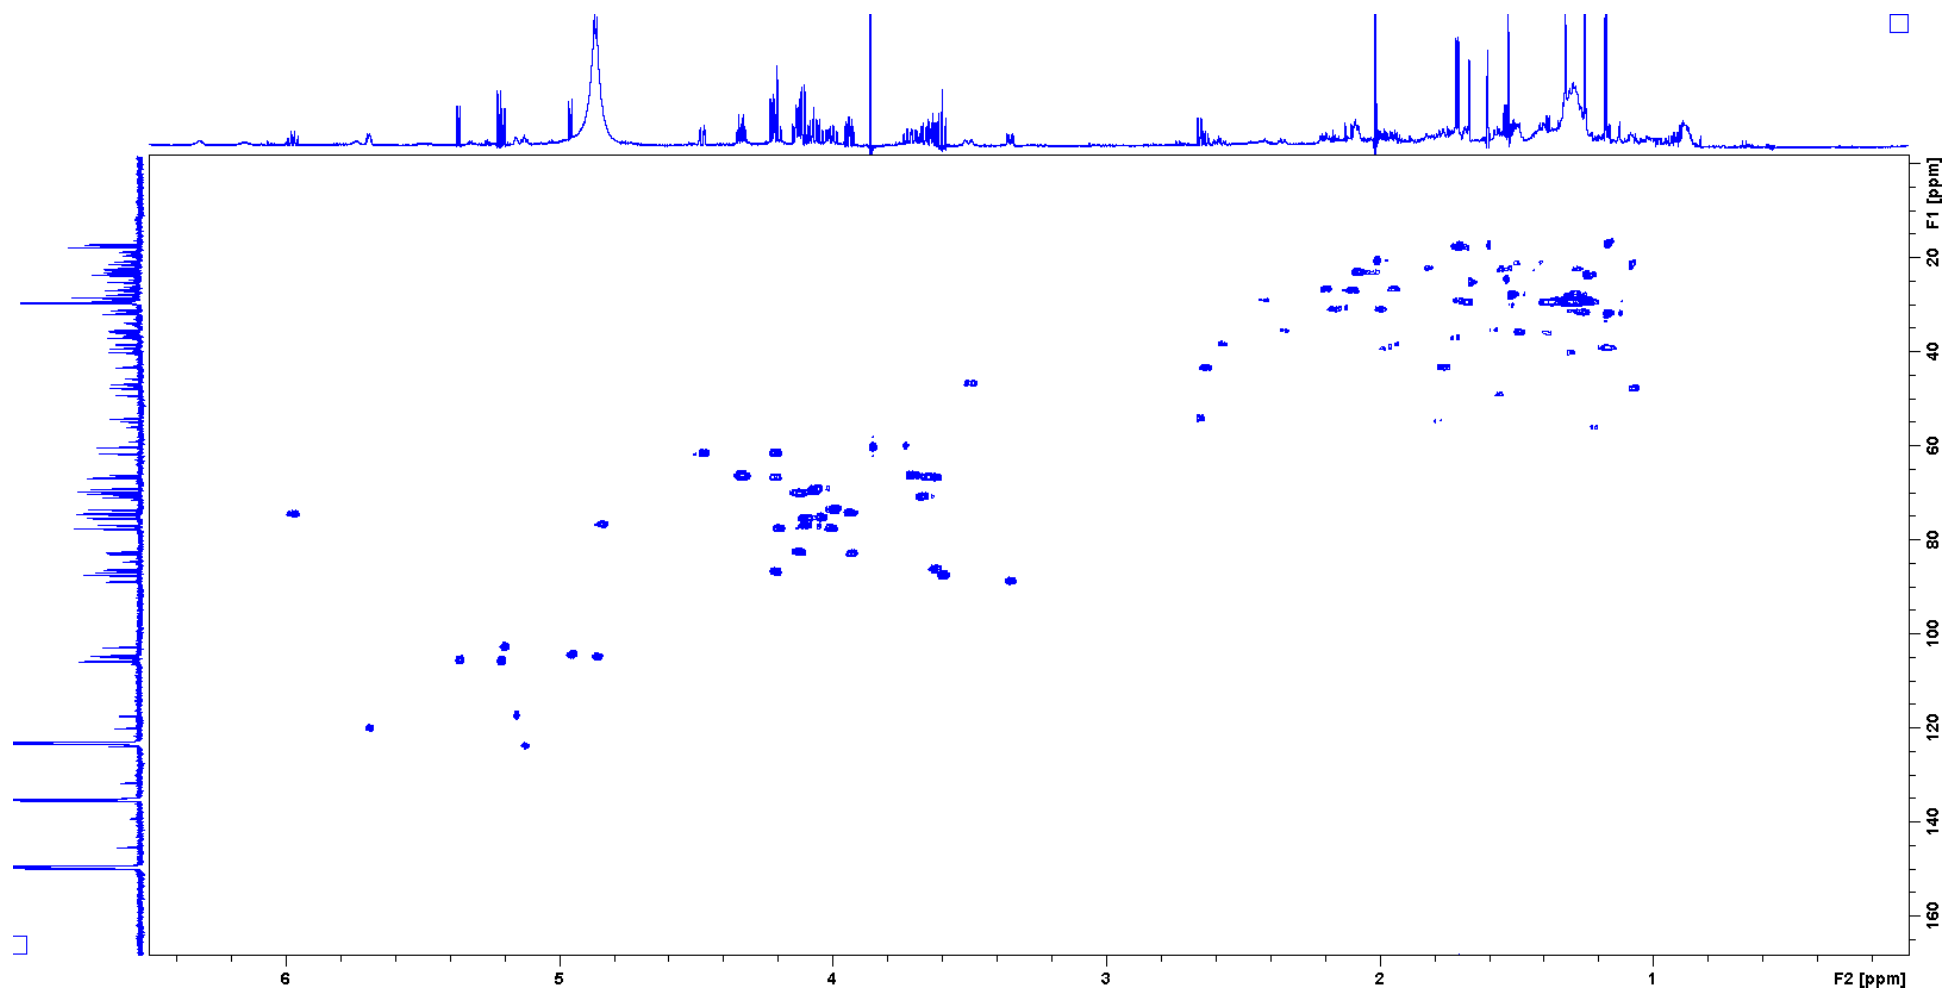

Figure S24. HMBC spectrum of pacificusoside C (3) in C<sub>5</sub>D<sub>5</sub>N.

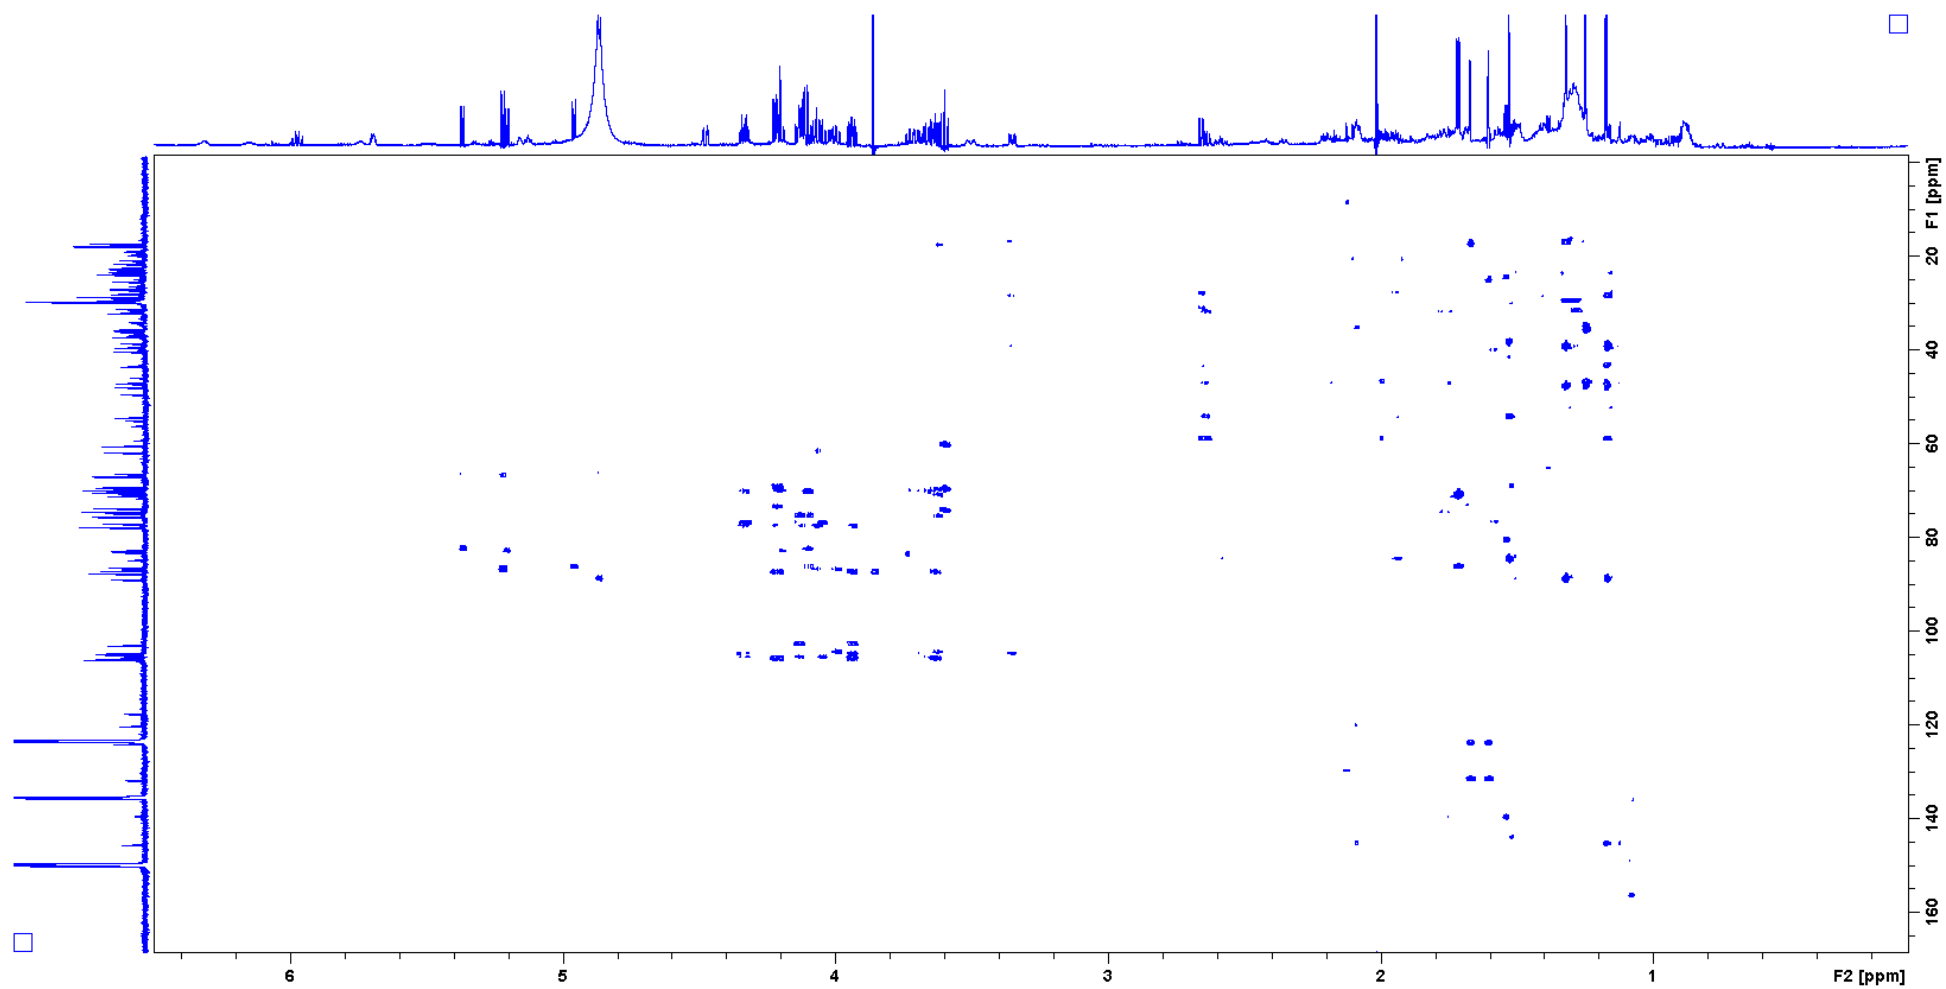

Figure S25. ROESY spectrum of pacificusoside C (3) in  $C_5D_5N$ .

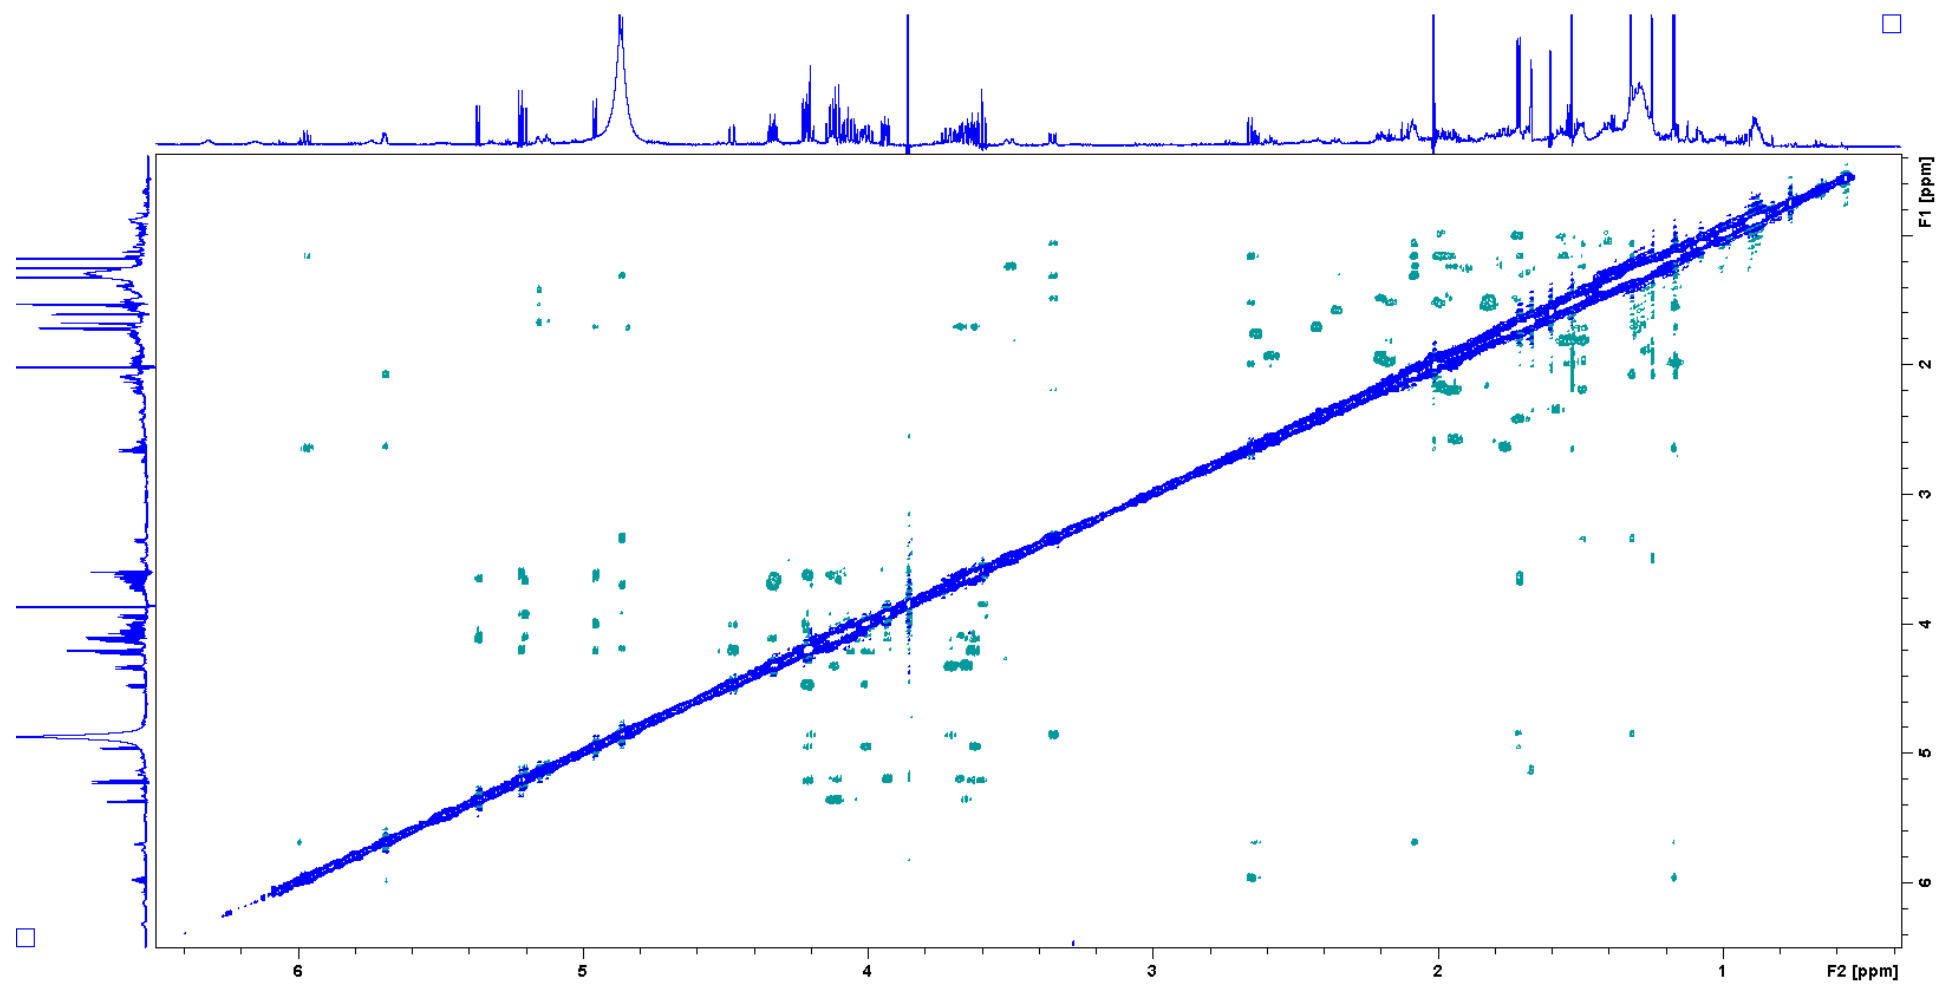

Supplement: biomolecules-11-00427-s001.pdf [file biomolecules-11-00427-s001.pdf]
